# Supplementary material for: Lineages, Virulence Gene Associated and Integrons among Extended Spectrum β-Lactamase (ESBL) and CMY-2 Producing Enterobacteriaceae from Bovine Mastitis, in Tunisia
Source: MDPI journal article supplement (doi:10.3390/pathogens11080948), 2022-08-22
Supplement: s1 [file s1]

**CTXM-15 (757pb)**

KU163311.1 Escherichia coli strain 358B extended-spectrum beta-lactamase CTX-M-15 (blaCTX-M-15) gene, partial cds

```
>GCCAGTTCACGCTGATGGCGACGGCCACCGTCACGCTGTTGTTAGGAAGTGTGCCGCTGTATGCGCAAAACGGCG
GACGTACAGCAAAAACCTTGCCGAATTAGAGCGGCAGTCGGGAGGCAGACTGGGTGTGGCATTGATTAACACAGCA
GATAATTCGCAAATACTTTATCGTGCTGATGAGCGCTTTGCGATGTGCAGCACCAGTAAAGTGATGGCCGGGCCG
CGGTGCTGAAGAAAAGTGAAAGCGAACC GAATCTGTTAAATCAGCGAGTTGAGATCAAAAAATCTGACCTTGTTA
ACTATAATCCGATTGCGGAAAAGCACGTCAATGGGACGATGTCACTGGCTGAGCTTAGCGCGGCCGCGCTACAGT
ACAGCGATAACGTGGCGATGAATAAGCTGATTGCTCACGTTGGCGGCCCGGCTAGCGTCACCGCGTTTCGCCCCGAC
AGCTGGGAGACGAAACGTTCCGTCTCGACCGTACCGAGCCGACGTTAAACACCGCCATTCCGGGCGATCCGCGTG
ATACCACTTCACCTCGGGCAATGGCGCAAACTCTGCGGAATCTGACGCTGGGTAAAGCATTGGGCGACAGCCAAC
GGGCGCAGCTGGTGACATGGATGAAAGGCAATACCACCGGTGCAGCGAGCATTAGGCTGGACTGCCTGCTTCCT
GGGTTGTGGGGGATAAAACCGGCAGCGGTGGCTATGGCACCACCAACGATATCGCGGTGATCTGGCCAAAAGATC
GTGCGCCG
```

**CTXM-15 (652pb)**

KU163311.1 Escherichia coli strain 358B extended-spectrum beta-lactamase CTX-M-15 (blaCTX-M-15) gene, partial cds

```
>GCCAGTTCACGCTGATGGCGACGGCCACCGTCACGCTGTTGTTAGGAAGTGTGCCGCTGTATGCGCAAAACGGCG
GACGTACAGCAAAAACCTTGCCGAATTAGAGCGGCAGTCGGGAGGCAGACTGGGTGTGGCATTGATTAACACAGCA
GATAATTCGCAAATACTTTATCGTGCTGATGAGCGCTTTGCGATGTGCAGCACCAGTAAAGTGATGGCCGGGCCG
CGGTGCTGAAGAAAAGTGAAAGCGAACC GAATCTGTTAAATCAGCGAGTTGAGATCAAAAAATCTGACCTTGTTA
ACTATAATCCGATTGCGGAAAAGCACGTCAATGGGACGATGTCACTGGCTGAGCTTAGCGCGGCCGCGCTACAGT
ACAGCGATAACGTGGCGATGAATAAGCTGATTGCTCACGTTGGCGGCCCGGCTAGCGTCACCGCGTTTCGCCCCGAC
AGCTGGGAGACGAAACGTTCCGTCTCGACCGTACCGAGCCGACGTTAAACACCGCCATTCCGGGCGATCCGCGTG
ATACCACTTCACCTCGGGCAATGGCGCAAACTCTGCGGAATCTGACGCTGGGTAAAGCATTGGGCGACAGCCAAC
GGGCGCAGCTGGTGACATGGATGAAAGGCAATACCACCGGTGCAGCGAGCATTAGGCTGGACTGCCTGCTTCCT
GGGTTGTGGGGGATAAAACCGGCAGCGGTGGCTATGGCACCACCAACGATATCGCGGTGATCTGGCCAAAAGATC
GTGCGCCG
```

**CTXM-15 (757pb)**

KU163311.1 Escherichia coli strain 358B extended-spectrum beta-lactamase CTX-M-15 (blaCTX-M-15) gene, partial cds

```
>GCCAGTTCACGCTGATGGCGACGGCCACCGTCACGCTGTTGTTAGGAAGTGTGCCGCTGTATGCGCAAAACGGCG
GACGTACAGCAAAAACCTTGCCGAATTAGAGCGGCAGTCGGGAGGCAGACTGGGTGTGGCATTGATTAACACAGCA
GATAATTCGCAAATACTTTATCGTGCTGATGAGCGCTTTGCGATGTGCAGCACCAGTAAAGTGATGGCCGGGCCG
CGGTGCTGAAGAAAAGTGAAAGCGAACC GAATCTGTTAAATCAGCGAGTTGAGATCAAAAAATCTGACCTTGTTA
ACTATAATCCGATTGCGGAAAAGCACGTCAATGGGACGATGTCACTGGCTGAGCTTAGCGCGGCCGCGCTACAGT
ACAGCGATAACGTGGCGATGAATAAGCTGATTGCTCACGTTGGCGGCCCGGCTAGCGTCACCGCGTTTCGCCCCGAC
AGCTGGGAGACGAAACGTTCCGTCTCGACCGTACCGAGCCGACGTTAAACACCGCCATTCCGGGCGATCCGCGTG
ATACCACTTCACCTCGGGCAATGGCGCAAACTCTGCGGAATCTGACGCTGGGTAAAGCATTGGGCGACAGCCAAC
GGGCGCAGCTGGTGACATGGATGAAAGGCAATACCACCGGTGCAGCGAGCATTAGGCTGGACTGCCTGCTTCCT
GGGTTGTGGGGGATAAAACCGGCAGCGGTGGCTATGGCACCACCAACGATATCGCGGTGATCTGGCCAAAAGATC
GTGCGCCG
```

**CTXM-15 (757pb)**

KU163311.1 Escherichia coli strain 358B extended-spectrum beta-lactamase CTX-M-15 (blaCTX-M-15) gene, partial cds

```
>GCCAGTTCACGCTGATGGCGACGGCCACCGTCACGCTGTTGTTAGGAAGTGTGCCGCTGTATGCGCAAAACGGCG
GACGTACAGCAAAAACCTTGCCGAATTAGAGCGGCAGTCGGGAGGCAGACTGGGTGTGGCATTGATTAACACAGCA
GATAATTCGCAAATACTTTATCGTGCTGATGAGCGCTTTGCGATGTGCAGCACCAGTAAAGTGATGGCCGGGCCG
CGGTGCTGAAGAAAAGTGAAAGCGAACC GAATCTGTTAAATCAGCGAGTTGAGATCAAAAAATCTGACCTTGTTA
ACTATAATCCGATTGCGGAAAAGCACGTCAATGGGACGATGTCACTGGCTGAGCTTAGCGCGGCCGCGCTACAGT
ACAGCGATAACGTGGCGATGAATAAGCTGATTGCTCACGTTGGCGGCCCGGCTAGCGTCACCGCGTTTCGCCCCGAC
AGCTGGGAGACGAAACGTTCCGTCTCGACCGTACCGAGCCGACGTTAAACACCGCCATTCCGGGCGATCCGCGTG
ATACCACTTCACCTCGGGCAATGGCGCAAACTCTGCGGAATCTGACGCTGGGTAAAGCATTGGGCGACAGCCAAC
GGGCGCAGCTGGTGACATGGATGAAAGGCAATACCACCGGTGCAGCGAGCATTAGGCTGGACTGCCTGCTTCCT
GGGTTGTGGGGGATAAAACCGGCAGCGGTGGCTATGGCACCACCAACGATATCGCGGTGATCTGGCCAAAAGATC
GTGCGCCG
```

**CTXM-15 (757pb)**

KU163311.1 Escherichia coli strain 358B extended-spectrum beta-lactamase CTX-M-15 (blaCTX-M-15) gene, partial cds

```
>GCCAGTTCACGCTGATGGCGACGGCCACCGTCACGCTGTTGTTAGGAAGTGTGCCGCTGTATGCGCAAAACGGCG
GACGTACAGCAAAAACCTTGCCGAATTAGAGCGGCAGTCGGGAGGCAGACTGGGTGTGGCATTGATTAACACAGCA
GATAATTCGCAAATACTTTATCGTGCTGATGAGCGCTTTGCGATGTGCAGCACCAGTAAAGTGATGGCCGGGCCG
CGGTGCTGAAGAAAAGTGAAAGCGAACC GAATCTGTTAAATCAGCGAGTTGAGATCAAAAAATCTGACCTTGTTA
ACTATAATCCGATTGCGGAAAAGCACGTCAATGGGACGATGTCACTGGCTGAGCTTAGCGCGGCCGCGCTACAGT
```

ACAGCGATAACGTGGCGATGAATAAGCTGATTGCTCACGTTGGCGGGCCCGGCTAGCGTCACCGCGTTTCGCCCCGAC  
AGCTGGGAGACGAAACGTTCCGTCTCGACCGTACCGAGCCGACGTTAAACACCGCCATTCCGGGCGATCCGCGTG  
ATACCACTTCACCTCGGGCAATGGCGCAAACCTCTGCGGAATCTGACGCTGGGTAAAGCATTGGGCGACAGCCAAAC  
GGGCGCAGCTGGTGACATGGATGAAAGGCAATACCACCGGTGCAGCGAGCATTACAGGCTGGACTGCCTGCTTCCT  
GGGTTGTGGGGGATAAAACCGGCAGCGGTGGCTATGGCACCACCAACGATATCGCGGTGATCTGGCCAAAAGATC  
GTGCGCCG

**CTXM-15 (757pb)**

KU163311.1 Escherichia coli strain 358B extended-spectrum beta-lactamase CTX-M-15 (blaCTX-M-15) gene, partial cds

>GCCAGTTCACGCTGATGGCGACGGCCACCGTCACGCTGTTGTTAGGAAGTGTGCCGCTGTATGCGCAAACGGCG  
GACGTACAGCAAAAACCTTGCCGAATTAGAGCGGCAGTCGGGAGGCAGACTGGGTGTGGCATTGATTAACACAGCA  
GATAATTTCGCAAATACTTTATCGTGCTGATGAGCGCTTTGCGATGTGCAGCACCAGTAAAGTGATGGCCGGGGCCG  
CGGTGCTGAAGAAAAGTGAAAGCGAACCGAATCTGTTAAATCAGCGAGTTGAGATCAAAAAATCTGACCTTGTTA  
ACTATAATCCGATTGCGGAAAAGCACGTCAATGGGACGATGTCACTGGCTGAGCTTAGCGCGGCCGCGCTACAGT  
ACAGCGATAACGTGGCGATGAATAAGCTGATTGCTCACGTTGGCGGGCCCGGCTAGCGTCACCGCGTTTCGCCCCGAC  
AGCTGGGAGACGAAACGTTCCGTCTCGACCGTACCGAGCCGACGTTAAACACCGCCATTCCGGGCGATCCGCGTG  
ATACCACTTCACCTCGGGCAATGGCGCAAACCTCTGCGGAATCTGACGCTGGGTAAAGCATTGGGCGACAGCCAAAC  
GGGCGCAGCTGGTGACATGGATGAAAGGCAATACCACCGGTGCAGCGAGCATTACAGGCTGGACTGCCTGCTTCCT  
GGGTTGTGGGGGATAAAACCGGCAGCGGTGGCTATGGCACCACCAACGATATCGCGGTGATCTGGCCAAAAGATC  
GTGCGCCG

**CTXM-15 (757pb)**

KU163311.1 Escherichia coli strain 358B extended-spectrum beta-lactamase CTX-M-15 (blaCTX-M-15) gene, partial cds

>GCCAGTTCACGCTGATGGCGACGGCCACCGTCACGCTGTTGTTAGGAAGTGTGCCGCTGTATGCGCAAACGGCG  
GACGTACAGCAAAAACCTTGCCGAATTAGAGCGGCAGTCGGGAGGCAGACTGGGTGTGGCATTGATTAACACAGCA  
GATAATTTCGCAAATACTTTATCGTGCTGATGAGCGCTTTGCGATGTGCAGCACCAGTAAAGTGATGGCCGGGGCCG  
CGGTGCTGAAGAAAAGTGAAAGCGAACCGAATCTGTTAAATCAGCGAGTTGAGATCAAAAAATCTGACCTTGTTA  
ACTATAATCCGATTGCGGAAAAGCACGTCAATGGGACGATGTCACTGGCTGAGCTTAGCGCGGCCGCGCTACAGT  
ACAGCGATAACGTGGCGATGAATAAGCTGATTGCTCACGTTGGCGGGCCCGGCTAGCGTCACCGCGTTTCGCCCCGAC  
AGCTGGGAGACGAAACGTTCCGTCTCGACCGTACCGAGCCGACGTTAAACACCGCCATTCCGGGCGATCCGCGTG  
ATACCACTTCACCTCGGGCAATGGCGCAAACCTCTGCGGAATCTGACGCTGGGTAAAGCATTGGGCGACAGCCAAAC  
GGGCGCAGCTGGTGACATGGATGAAAGGCAATACCACCGGTGCAGCGAGCATTACAGGCTGGACTGCCTGCTTCCT  
GGGTTGTGGGGGATAAAACCGGCAGCGGTGGCTATGGCACCACCAACGATATCGCGGTGATCTGGCCAAAAGATC  
GTGCGCCG

**CMY2 (1146pb)**

ON412783.1 Escherichia coli IS1380-like element ISEc9 family transposase gene, partial cds;  
and class C beta-lactamase CMY-2 gene, complete cds

>ATGATGAAAAAATCGTTATGCTGCGCTCTGCTGCTGACAGCCTCTTTCTCCACATTTGCTGCCGCAAAAACAGA  
ACAACAGATTGCCGATATCGTTAATCGCACCATCACCCCGTTGATGCAGGAGCAGGCTATTCCGGGTATGGCCGT  
TGCCGTTATCTACCAGGGAAAACCTTATTATTTACCTGGGGTAAAGCCGATATCGCCAATAACCACCCAGTCAC  
GCAGCAAACGCTGTTTTGAGCTAGGATCGGTTAGTAAGACGTTTAAACGGCGTGTTGGGCGGCGATGCTATCGCCCC  
CGGCGAAATTAAGCTCAGCGATCCGGTCACGAAATACTGGCCAGAACTGACAGGCAAACAGTGGCAGGGTATCCG  
CCTGCTGCACTTAGCCACCTATACGGCAGGCGGCCTACCGCTGCAGATCCCCGATGACGTTAGGGATAAAGCCGC  
ATTACTGCATTTTTATCAAACTGGCAGCCGCAATGGACTCCGGGCGCTAAGCGACTTTACGCTAACTCCAGCAT  
TGGTCTGTTTGGCGCGCTGGCGGTGAAACCTCAGGAATGAGTTACGAAGAGGCAATGACCAGACGCGTCCTGCA  
ACCATTAAAACTGGCGCATACCTGGATTACGGTTCCGCAGAACGAACAAAAAGATTATGCCTGGGGCTATCGCGA  
AGGGAAGCCCGTACACGTTTCTCCGGGACAACCTTGACGCCGAAGCCTATGGCGTGAAATCCAGCGTTATTGATAT  
GGCCCGCTGGGTTTCAGGCCAACATGGATGCCAGCCACGTTTCAGGAGAAAACGCTCCAGCAGGGCATTGCGCTTGC  
GCAGTCTCGCTACTGGCGTATTGGCGATATGTACCAGGGATTAGGCTGGGAGATGCTGAACTGGCCGCTGAAAGC  
TGATTTCGATCATCAACGGCAGCGACAGCAAAGTGGCATTGGCAGCGCTTCCCGCCGTTGAGGTAAACCCGCCCGC  
CCCCGCAGTGAAAGCCTCATGGGTGCATAAAACGGGCTCCACTGGTGGATTGGCAGCTACGTAGCCTTCGTTCC  
AGAAAAAACCTTGGCATCGTGATGCTGGCAAACAAAAGCTATCCTAACCTGTCCGTGTCGAGGCGGCCTGGCG  
CATTCTTGAAAGCTGCAATAA

**CMY2 (901pb)**

ON412783.1 Escherichia coli IS1380-like element ISEc9 family transposase gene, partial cds;  
and class C beta-lactamase CMY-2 gene, complete cds

>ATGATGAAAAAATCGTTATGCTGCGCTCTGCTGCTGACAGCCTCTTTCTCCACATTTGCTGCCGCAAAAACAGA  
ACAACAGATTGCCGATATCGTTAATCGCACCATCACCCCGTTGATGCAGGAGCAGGCTATTCCGGGTATGGCCGT  
TGCCGTTATCTACCAGGGAAAACCTTATTATTTACCTGGGGTAAAGCCGATATCGCCAATAACCACCCAGTCAC  
GCAGCAAACGCTGTTTTGAGCTAGGATCGGTTAGTAAGACGTTTAAACGGCGTGTTGGGCGGCGATGCTATCGCCCC  
CGGCGAAATTAAGCTCAGCGATCCGGTCACGAAATACTGGCCAGAACTGACAGGCAAACAGTGGCAGGGTATCCG  
CCTGCTGCACTTAGCCACCTATACGGCAGGCGGCCTACCGCTGCAGATCCCCGATGACGTTAGGGATAAAGCCGC  
ATTACTGCATTTTTATCAAACTGGCAGCCGCAATGGACTCCGGGCGCTAAGCGACTTTACGCTAACTCCAGCAT

TGGTCTGTTTTGGCGCGCTGGCGGTGAAACCCCTCAGGAATGAGTTACGAAGAGGCAATGACCAGACGCGTCCTGCA  
ACCATTA AAACTGGCGCATACCTGGATTACGGTTCGCGAGAACGAACAAAAAGATTATGCCTGGGGCTATCGCGA  
AGGGAAGCCCGTACACGTTTTCTCCGGGACAACCTTGACGCCGAAGCCTATGGCGTGAAATCCAGCGTTATTGATAT  
GGCCCGCTGGGTTT CAGGCCAACATGGATGCCAGCCACGTT CAGGAGAAAAACGCTCCAGCAGGGCATTGCGCTTGC  
GCAGTCTCGCTACTGGCGTATTGGCGATATGTACCAGGGATTAGGCTGGGAGATGCTGAACTGGCCGCTGAAAGC  
TG

#### **CMY2 (1040pb)**

ON412783.1 Escherichia coli IS1380-like element ISEc9 family transposase gene, partial cds;  
and class C beta-lactamase CMY-2 gene, complete cds

>ATGATGAAAAAATCGTTATGCTGCGCTCTGCTGCTGACAGCCTCTTTCTCCACATTTGCTGCCGCAAAAACAGA  
ACAACAGATTGCCGATATCGTTAATCGCACCATCACCCCGTTGATGCAGGAGCAGGCTATTCCGGGTATGGCCGT  
TGCCGTTATCTACCAGGGAACCCCTATTATTTACCTGGGGTAAAGCCGATATCGCCAATAACCAACCAGTCAC  
GCAGCAAACGCTGTTTTGAGCTAGGATCGGTTAGTAAGACGTTTAAACGGCGTGTTGGGCGGCGATGCTATCGCCCG  
CGGCGAAATTAAGCTCAGCGATCCGGTCACGAAATACTGGCCAGAACTGACAGGCAAAACAGTGGCAGGGTATCCG  
CCTGCTGCACTTAGCCACCTATACGGCAGGCGGCCTACCGCTGCAGATCCCCGATGACGTTAGGGATAAAGCCGC  
ATTACTGCATTTTTATCAAACTGGCAGCCGCAATGGACTCCGGGCGCTAAGCGACTTTACGCTAACTCCAGCAT  
TGGTCTGTTTTGGCGCGCTGGCGGTGAAACCCCTCAGGAATGAGTTACGAAGAGGCAATGACCAGACGCGTCCTGCA  
ACCATTA AAACTGGCGCATACCTGGATTACGGTTCGCGAGAACGAACAAAAAGATTATGCCTGGGGCTATCGCGA  
AGGGAAGCCCGTACACGTTTTCTCCGGGACAACCTTGACGCCGAAGCCTATGGCGTGAAATCCAGCGTTATTGATAT  
GGCCCGCTGGGTT CAGGCCAACATGGATGCCAGCCACGTT CAGGAGAAAAACGCTCCAGCAGGGCATTGCGCTTGC  
GCAGTCTCGCTACTGGCGTATTGGCGATATGTACCAGGGATTAGGCTGGGAGATGCTGAACTGGCCGCTGAAAGC  
TGATTTCGATCATCAACGGCAGCGACAGCAAAAGTGGCATTGGCAGCGCTTCCCGCCGTTGAGGTAAACCCGCCCGC  
CCCCGAGTGAAAGCCTCATGGGTGCATAAAACGGGCTCCACTGGTGGATTTGGCAGCTACGTAGC

#### **OXA-1 (1031pb)**

MH208296.1 Escherichia coli strain Syl6 class 1 integron oxacillin-hydrolyzing class D beta-  
lactamase OXA-1 (blaOXA) gene, blaOXA-1 allele and aminoglycoside 3'- (9) - O -  
adenyltransferase (aadA1) gene, complete cds

>ACGCAGCAGGGCAGTCGCCCTAAACAAAGTTGGGCGAACCCGGAGCCTCATTAATTTGTTAGCCGTTAAAAATTA  
AGCCCTTTTACCAAACCAATACTTATTATGAAAAACACAATACATATCAACTTCGCTATTTTTTTTAATAATTGCAA  
ATATTATCTACAGCAGCGCCAGTGCATCAACAGATATCTCTACTGTTGCATCTCCATTATTTGAAGGAACTGAAG  
GTTGTTTTTTTACTTTACGATGCATCCACAAACGCTGAAATTGCTCAATTCAATAAAGCAAAAGTGTGCAACGCAAA  
TGGCACCAGATTCAACTTTCAAGATCGCATTATCACTTATGGCATTGATGCGGAAATAATAGATCAGAAAAACCA  
TATTCAAATGGGATAAAACCCCCAAAGGAATGGAGATCTGGAACAGCAATCATAACCAAAGACGTGGATGCAAT  
TTTCTGTTGTTTGGGTTTCGCAAGAAATAACCCAAAAAATTGGATTAAATAAAATCAAGAATTATCTCAAAGATT  
TTGATTATGGAATCAAGACTTCTCTGGAGATAAAGAAAGAAACAACGGATTAACAGAAGCATGGCTCGAAAAGTA  
GCTTAAAAATTTTACCAGAAGAACAATTCATTCCTGCGTAAAATTATTAATCACAATCTCCAGTTAAAAACT  
CAGCCATAGAAAACACCATAGAGAACATGTATCTACAAGATCTGGATAATAGTACAAAACGTATGGGAAAACTG  
GTGCAGGATTACAGCAAATAGAACCTTACAAAACGGATGGTTTTGAAGGGTTTATTATAAGCAAATCAGGACATA  
AATATGTTTTTGTGTCCGCACTTACAGGAACTTGGGGTGAATTTAATCAAGCATAAAAAGCCAAGAAAAATG  
CGATCACCATTCTAAACACACTAAATTTATAAAAAATCTAATGGCAAAATCGCCCAACCTTCAATCAAGTCGGG  
ACGCCAAAAGCAAGCTTTTGGCTCCCTCGCTGGCGCTCGGCGCCCTTATTTCAA

#### **TEM1 (1069pb)**

CP099722.1 Escherichia coli strain EC21GDE043 plasmid pGDE043-mcr1, complete sequence

>TTCTTGAAGACGAAAGGGCCTCGTGATACGCCTATTTTTATAGGTTAATGTCATGATAATAATGGTTTCTTAGA  
CGTCAGGTGGCACTTTTCGGGGAAATGTGCGCGGAACCCCTATTTGTTTATTTTTCTAAATACATTCAAAATATGT  
ATCCGCTCATGACACAATAACCCCTGGTAAATGCTTCAATAATATTGAAAAAGGAAGAGTATGAGTATTCAACATT  
TTCGTGTGCCCTTATTCCCTTTTTTGGCGCATTTTGCCTTCTGTTTTTGTCTACCCAGAAACGCTGGTGAAAG  
TAAAAGATGCTGAAGATCAGTTGGGTGCACGAGTGGGTTACATCGAACTGGATCTCAACAGCGGTAAGATCCTTG  
AGAGTTTTTCGCCCCGAAGAACGTTTTTCCAATGATGAGCACTTTTAAAGTTCTGCTATGTGGTGCAGTATTATCCC  
GTGTTGACGCCGGGCAAGAGCAACTCGGTGCGCGCATACACTATTCTCAGAATGACTTGGTTGAGTACTCACCAG  
TCACAGAAAAGCATCTTACGGATGGCATGACAGTAAGAGAATTATGCAGTGCTGCCATAACCATGAGTGATAACA  
CTGCTGCCAACTTACTTCTGACAACGATCGGAGGACCGAAGGAGCTAACCGCTTTTTTGCACAACATGGGGGATC  
ATGTAATTCGCCTTGATCGTTGGGAACCGGAGCTGAATGAAGCCATACCAAACGACGAGCGTGACACCACGATGC  
CTGCAGCAATGGCAACAACGTTGCGCAAACTATTAACCTGGCGAACTACTTACTCTAGCTTCCCGGCAACAATTA  
TAGACTGGATGGAGGCGGATAAAGTTGCAGGACCACTTCTGCGCTCGGCCCTTCCGGCTGGCTGGTTTATTGCTG  
ATAAATCTGGAGCCGGTGAGCGTGGGTCTCGCGGTATCATTGCAGCACTGGGGCCAGATGGTAAGCCCTCCCGTA  
TCGTAGTTATCTACACGACGGGGAGTCAGGCAACTATGGATGAACGAAATAGACAGATCGCTGAGATAGGTGCCT  
CACTGATTAAGCATTGGTAA

#### **TEM1 (739pb)**

CP099722.1 Escherichia coli strain EC21GDE043 plasmid pGDE043-mcr1,  
complete sequence

>TTCTTGAAGACGAAAGGGCCTCGTGATACGCCTATTTTTATAGGTTAATGTCATGATAATAATGGTTTCTTAGA  
CGTCAGGTGGCACTTTTCGGGGAAATGTGCGCGGAACCCCTATTTGTTTATTTTTCTAAATACATTCAAAATATGT

ATCCGCTCATGAGACAATAACCCTGGTAAATGCTTCAATAATATTGAAAAAGGAAGAGTATGAGTATTCAACATT  
TTCGTGTGCGCCCTTATTCCCTTTTTTTCGCGGCATTTTGCCTTCCTGTTTTTGTCTACCCAGAAACGCTGGTGAAAAG  
TAAAAGATGCTGAAGATCAGTTGGGTGCACGAGTGGGTTACATCGAACTGGATCTCAACAGCGGTAAGATCCTTG  
AGAGTTTTTCGCCCCGAAGAACGTTTTTCCAATGATGAGCACTTTTAAAGTTCTGCTATGTGGTGCGGTATTATCCC  
GTGTTGACGCCGGGCAAGAGCAACTCGGTGCGCGCATACACTATTCTCAGAATGACTTGGTTGAGTACTCACCAG  
TCACAGAAAAGCATCTTACGGATGGCATGACAGTAAGAGAATTATGCAGTGCTGCCATAACCATGAGTGATAACA  
CTGCTGCCAACTTACTTCTGACAACGATCGGAGGACCGAAGGAGCTAACCGCTTTTTTGCACAACATGGGGGATC  
ATGTAACTCGCCTTGATCGTTGGGAACCGGAGCTGAATGAAGCCATACCAAACGACGAGCGTGAC

#### **TEM<sub>C</sub> (974pb)**

CP099722.1 Escherichia coli strain EC21GDE043 plasmid pGDE043-mcr1, complete sequence

>TTCTTGAAGACGAAAGGGCCTCGTGATACGCCTATTTTTATAGGTTAATGTCATGATAATAATGGTTTCTTAGA  
CGTCAGGTGGCACTTTTCGGGGAAATGTGCGCGGAACCCCTATTTGTTTATTTTTCTAAATACATTCAAATATGT  
ATCCGCTCATGAGACAATAACCCTGGTAAATGCTTCAATAATATTGAAAAAGGAAGAGTATGAGTATTCAACATT  
TTCGTGTGCGCCCTTATTCCCTTTTTTTCGCGGCATTTTGCCTTCCTGTTTTTGTCTACCCAGAAACGCTGGTGAAAAG  
TAAAAGATGCTGAAGATCAGTTGGGTGCACGAGTGGGTTACATCGAACTGGATCTCAACAGCGGTAAGATCCTTG  
AGAGTTTTTCGCCCCGAAGAACGTTTTTCCAATGATGAGCACTTTTAAAGTTCTGCTATGTGGTGCGGTATTATCCC  
GTGTTGACGCCGGGCAAGAGCAACTCGGTGCGCGCATACACTATTCTCAGAATGACTTGGTTGAGTACTCACCAG  
TCACAGAAAAGCATCTTACGGATGGCATGACAGTAAGAGAATTATGCAGTGCTGCCATAACCATGAGTGATAACA  
CTGCTGCCAACTTACTTCTGACAACGATCGGAGGACCGAAGGAGCTAACCGCTTTTTTGCACAACATGGGGGATC  
ATGTAACTCGCCTTGATCGTTGGGAACCGGAGCTGAATGAAGCCATACCAAACGACGAGCGTGACACCACGATGC  
CTGCAGCAATGGCAACAACGTTGCGCAAACTATTAAGTGGCGAACTACTTACTCTAGCTTCCCGGCAACAATTAA  
TAGACTGGATGGAGGCGGATAAAGTTGCAGGACCACTTCTGCGCTCGGCCCTTCCGGCTGGCTGGTTTATTGCTG  
ATAAATCTGGAGCCGGTGAGCGTGGGTCTCGCGGTATCATTGCAGCACTGGGGCCAGATGGTAAGCCCTCCCGTA

#### **TEM<sub>C</sub> (1049pb)**

CP099722.1 Escherichia coli strain EC21GDE043 plasmid pGDE043-mcr1, complete sequence

>TTCTTGAAGACGAAAGGGCCTCGTGATACGCCTATTTTTATAGGTTAATGTCATGATAATAATGGTTTCTTAGA  
CGTCAGGTGGCACTTTTCGGGGAAATGTGCGCGGAACCCCTATTTGTTTATTTTTCTAAATACATTCAAATATGT  
ATCCGCTCATGAGACAATAACCCTGGTAAATGCTTCAATAATATTGAAAAAGGAAGAGTATGAGTATTCAACATT  
TTCGTGTGCGCCCTTATTCCCTTTTTTTCGCGGCATTTTGCCTTCCTGTTTTTGTCTACCCAGAAACGCTGGTGAAAAG  
TAAAAGATGCTGAAGATCAGTTGGGTGCACGAGTGGGTTACATCGAACTGGATCTCAACAGCGGTAAGATCCTTG  
AGAGTTTTTCGCCCCGAAGAACGTTTTTCCAATGATGAGCACTTTTAAAGTTCTGCTATGTGGTGCGGTATTATCCC  
GTGTTGACGCCGGGCAAGAGCAACTCGGTGCGCGCATACACTATTCTCAGAATGACTTGGTTGAGTACTCACCAG  
TCACAGAAAAGCATCTTACGGATGGCATGACAGTAAGAGAATTATGCAGTGCTGCCATAACCATGAGTGATAACA  
CTGCTGCCAACTTACTTCTGACAACGATCGGAGGACCGAAGGAGCTAACCGCTTTTTTGCACAACATGGGGGATC  
ATGTAACTCGCCTTGATCGTTGGGAACCGGAGCTGAATGAAGCCATACCAAACGACGAGCGTGACACCACGATGC  
CTGCAGCAATGGCAACAACGTTGCGCAAACTATTAAGTGGCGAACTACTTACTCTAGCTTCCCGGCAACAATTAA  
TAGACTGGATGGAGGCGGATAAAGTTGCAGGACCACTTCTGCGCTCGGCCCTTCCGGCTGGCTGGTTTATTGCTG  
ATAAATCTGGAGCCGGTGAGCGTGGGTCTCGCGGTATCATTGCAGCACTGGGGCCAGATGGTAAGCCCTCCCGTA  
TCGTAGTTATCTACACGACGGGGAGTCAGGCAACTATGGATGAACGAAATAGACAGATCGCTGAGATAGGTGCCCT

#### **aac-6' (Ib) -cr: (755pb)**

NG\_067971.1 Serratia marcescens subsp. marcescens S89 pPCMI3 aac(6')-Ib-cr gene for  
fluoroquinolone-acetylating aminoglycoside 6'-N-acetyltransferase AAC(6')-Ib-cr9, complete CDS

>GTTGCTTCGTGGCGGCGCTTGCGTGCTACGCTAAGCTTCGCACGCCGCTTGCCACTGCGCACCGCGGCTTAACT  
CAGGCGTTAGCCACCAAGAAGGTGCCATGAAAACATTTAACGATTCCGTACACTGCGCCTCATGACTGAGCATG  
ACCTTGCGATGCTCTATGAGTGGCTAAATCGATCTCATATCGTTCGAGTGGTGGGGCGGAGAAGAAGCACGCCCGA  
CACTTGCTGACGTACAGGAACAGTACTTGCCAAAGCGTTTTAGCGCAAGAGTCCGTCACTCCATACATTGCAATGC  
TGAATGGAGAGCCGATTGGGTATGCCAGTCGTACGTTGCTCTTGGAAGCGGGGACGGAAGGTGGGAAGAAGAAA  
CCGATCCAGGAGTACGCGGAATAGACCAGTTACTGGCGAATGCATCACAACTGGGCAAAGGCTTGGGAACCAAGC  
TGGTTTCGAGCTCTGGTTGAGTTGCTGTTCAATGATCCCCGAGGTACCAAGATCCAAACGGACCCGTCGCCGAGCA  
ACTTGCGAGCGATCCGATGCTACGAGAAAGCGGGTTTTGAGAGGCAAGGTACCGTAACCAACCCCATATGGTCCAG  
CCGTGTACATGGTTCAAACACGCCAGGCATTTCGAGCGAACACGCAGTGATGCCTAACCTTCCATCGAGGGGGAC  
GTCCAAGGGCTGGCGCCCTTGGCCGCCCTCATGTCAAACGTTGAGCGACTGCTTACCCGTTTGACGGTCGCGCC  
CTCCTG

#### **aac-6' (Ib) -cr: (654pb)**

NG\_067971.1 Serratia marcescens subsp. marcescens S89 pPCMI3 aac(6')-Ib-cr gene for  
fluoroquinolone-acetylating aminoglycoside 6'-N-acetyltransferase AAC(6')-Ib-cr9, complete CDS

>GTTGCTTCGTGGCGGCGCTTGCGTGCTACGCTAAGCTTCGCACGCCGCTTGCCACTGCGCACCGCGGCTTAACT  
CAGGCGTTAGCCACCAAGAAGGTGCCATGAAAACATTTAACGATTCCGTACACTGCGCCTCATGACTGAGCATG  
ACCTTGCGATGCTCTATGAGTGGCTAAATCGATCTCATATCGTTCGAGTGGTGGGGCGGAGAAGAAGCACGCCCGA  
CACTTGCTGACGTACAGGAACAGTACTTGCCAAGCGTTTTAGCGCAAGAGTCCGTCACTCCATACATTGCAATGC  
TGAATGGAGAGCCGATTGGGTATGCCAGTCGTACGTTGCTCTTGGAAGCGGGGACGGAAGGTGGGAAGAAGAAA  
CCGATCCAGGAGTACGCGGAATAGACCAGTTACTGGCGAATGCATCACAACTGGGCAAAGGCTTGGGAACCAAGC

TGGTTCGAGCTCTGGTTGAGTTGCTGTTCAATGATCCCGAGGTCACCAAGATCCAAACGGACCCGTCGCCGAGCA  
ACTTGCGAGCGATCCGATGCTACGAGAAAGCGGGGTTTGGAGAGGCAAGGTACCGTAACCAACCCCATATGGTCCAG  
CCGTGTACATGGTTCAAACACGCCAGGCATTTCGAGCGAACACGCAGTGATGCCTA

***dfrA17* (474pb)**

NG\_047710.1 Escherichia coli GH326 *dfrA17* gene for trimethoprim-resistant dihydrofolate reductase *DfrA17*, complete CDS

>TTGAAATATCATTGATTTCTGCAGTGTGAGAAATGGCGTAATCGGTAGTGGTCCTGATATCCCGTGGTCAGT  
AAAAGGTGAGCAACTACTCTTTAAAGCGCTCACATATAATCAATGGCTCCTTGTGCGAAGAAAAACATTTGACTC  
TATGGGTGTTCTTCCAAATCGCAAATATGCAGTAGTGTCAAAGAACGGAATTTCAAGCTCAAATGAAAACGTCCT  
AGTTTTTCTTCAATAGAAAATGCTTTGAAAGAGCTATCAAAGTTACAGATCATGTATATGTCTCTGACGGGGG  
TCAAATCTATAATAGCCTTATTGAAAAGCAGATATAATTCATTTGTCTACTGTTACGTTGAAGTGAAGGTGA  
TATCAAATCCCTATAATGCCTGAGAATTTCAATTTGGTTTTTGAACAGTTTTTTATGTCTAATATAAATTATAC  
ATACCAGATTTGAAAAAAGGCTAA

**Gene cassette of integron class1: *dfrA1+aadA1* (1112pb)**

CP054237.1 Escherichia coli strain EcPF5 plasmid p1, complete sequence

>GAGTTATCGGAATGGCCCTGATATTCATGGAGTGCCAAAGGTGAACAGCTCCTGTTTAAAGCTATTACCTAT  
AACCAATGGCTGTTGGTTGGACGCAAGACTTTTGAATCAATGGGAGCATTACCCAACCGAAAAGTATGCGGTCGTA  
ACACGTTCAAGTTTTACATCTGACAATGAGAACGTAGTGATCTTTCCATCAATTAAGATGCTTTAACCAACCTA  
AAGAAAATAACGGATCATGTGCTATTGTTTCAGGTGGTGGGAGATATACAAAAGCCTGATCGATCAAGTAGATACA  
CTACATATATCTACAATAGACATCGAGCCGGAAGGTGATGTTTACTTTCTGAAATCCCCAGCAATTTTAGGCCA  
GTTTTTACCCAAGACTTCGCCTCTAACATAAATTATAGTTACCAAATCTGGCAAAAGGGTTAACAAGTGGCAGCA  
ACGGATTGCGAAACCTGTACGCCTTTTGTACCAAAGCCGCGCCAGGTTTGGCATCCGCTGTGCCAGGCGTTAA  
ACATCATGAGGGAAGCGGTGATCGCCGAAGTATCGACTCAACTATCAGAGGTAGTTGGCGTCATCGAGCGCCATC  
TCGAACCGACGTTGCTGGCCGTACATTTGTACGGCTCCGCAGTGGAATGGCGGCCCTGAAGCCACACAGTGATATTG  
ATTTGCTGTTTACGGTGACCGTAAGGCTTGATGAAACAACGCGGCGAGCTTTGATCAACGACCTTTTGGAACCTT  
CGGCTTCCCCCTGGAGAGAGCGAGATTCTCCGCGCTGTAGAAAGTCACCATTGTTGTGCACGACGACATCATTCGGT  
GGCGTTATCCAGCTAAGCGCGAACTGCAATTTGGAGAATGGCAGCGCAATGACATTCTTGCAGGTATCTTCGAGC  
CAGCCACGATCGACATTGATCTGGCTATCTTGCTGACAAAAGCAAGAGAACATAGCGTTGCTTGGTAGGTCCAG  
CGGCGGAGGAACTCTTTGATCCGGTTCCTGAACAGGATCTATTTGAGGCGCTAAATGAAACCTTAACGCTATGGA  
ACTCGCCGCCCCGACTGGGCTGGCGATGAGCGAAATGTAGTGCTTACGTTGTCCCGCATTTGG

**Gene cassette of integron class1 *dfrA17+aadA1* (1120pb)**

AM937244.2 Escherichia coli class I integron containing *dhfr17* and *aadA5* genes

>CGCGTTACGCCGTGGGTGATGTTTGGATGTTATGGAGCAGCAACGATGTTACGCAGCAGGGCAGTCGCCCTAAA  
ACAAAGTTAGCCATTAAGGGAGTTAAATTGAAAATATCATTGATTTCTGCAGTGTGAGAAATGGCGTAATCGGT  
AGTGGTCCTGATATCCCGTGGTCAGTAAAGGTGAGCAACTACTCTTTAAAGCGCTCACATATAATCAATGGCTC  
CTTGTCGGAAGAAAAACATTTGACTCTATGGGTGTTCTTCCAAATCGCAAATATGCAGTAGTGTCAAAGAACGGA  
ATTTCAAGCTCAAATGAAAACGTCCTAGTTTTTCTTCAATAGAAAATGCTTTGAAAGAGCTATCAAAGTTACA  
GATCATGTATATGTCTCTGGCGGGGTCAAATCTATAATAGCCTTATTGAAAAGCAGATATAATTCATTTGTCT  
ACTGTTACGTTGAAGTGAAGATGATATCAAATCCCTATAATGCCTGAGAATTTCAATTTGGTTTTTGAACAG  
TTTTTTATGTCTAATATAAATTATACATACCAGATTTGAAAAAAGGCTAACAATGCGTTGCAGCACCAGTCGCT  
TCGCTCCTTGGACAGCTTTTTAAGTCGTGTCTTTGTGGTTTTGCTGCGCAAAAGTATTCCACAAAAGCCGCAACTTA  
AAAGCTGCCGCTGAACCTTAACGTTAGGCATCATGGGTGAATTTTTCCCTGCACAAGTTTTCAAGCAGCTGTCCCA  
CGCTCGCGCGGTGATCGAGCGCCATCTGGCTGCGACACTGGACACAATCCACCTGTTTCGGATCTGCGATCGATGG  
AGGGCTGAAGCCGGACAGCGACATAGACTTGCTCGTGACCGTCAGCGCCGCACCTAACGATTCGCTCCGGCAGGC  
GCTAATGCTCGATTTGCTGAAAGTCTCATACCGCCAGGCGATGGCGGAACATGGCGACCGCTGGAGCTAACTGT  
TGTCGCTCGAAGCGAAGTAGTGCTTGGCGCTATCCGGCGCGCGCTGAGCTTCAGTTCGGTGAGTGCTCCGCCA  
CGACATCCTTTCCGGAACGTTTCGAGCCTGCCGTTCTGGATCACGATCTTGCGATTTTGTGCTGACCAAGGCGA

***dfrA12+aadA2* (980pb)**

DQ995286.1 Acinetobacter baumannii class I integron dihydrofolate reductase (*dhfrXII*) and streptomycin/spectinomycin 3' adenylyltransferase (*aadA2*) genes, complete cds

>CGTACGCCGTGGGTGATGTTTGGATGTTATGGAGCAGCAACGATGTTACGCAGCAGGGCAGTCGCCCTAAAAACA  
AAGTTAGCCATATGAACTCGGAATCAGTACGCATTTATCTCGTTGCTGCGATGGGAGCCAATCGGGTTATTGGCA  
ATGGTCCTAATATCCCCTGGAAAATTCGGGGTGAGCAGAAGATTTTTTCGCACTCACTGAGGGAAAAAGTCGTTG  
TCATGGGGCGAAAGACCTTTGAGTCTATCGGCAAGCCTCTACCGAACCGTCACACATTGGTAATCTCACGCCAAG  
CTAACTACCGCGCCACTGGCTGCGTAGTTGTTTCAACGCTGTGCGACGCTATCGCTTTGGCATCCGAACTCGGCA  
ATGAATCTACGTCGCGGCGGAGCTGAGATATACACTCTGGCACTACCTCACGCCCACGGCGTGTCTATCTG  
AGGTACATCAACCTTCGAGGGTGACGCTTCTTCCCAATGCTCAACGAAACAGAATTCGAGCTTGCTCAACCG  
AAACCATTCAAGCTGTAATTCCGTACACCCACTCCGTTTATGCGCGTCGAAACGGCTAACCATTCCGTCAACGGG  
ACGCCAAAATGCTGCGCATTTTGGTTCCCTCCGCTGCGCTCCGGCTCTCGTTACGTCCAACGTTAGCACCCTGA  
AACCCAGCTTTATTTAGCTCATGTTTATTCAAACGGCATTTAGCTTTTTCAGGCGTTATTTCAGTGCTGCTTTTGGC  
TTTTTTCCGGGCTTCGCTGCGATGGGCTGCGCAGGTTTTTCAGTCTTTTTTGGCCTCTAGCCCTTGCGTAGCAAGCG

CAAGCAGCTATCGTTTTTGCAGTGCTGTGCCGCTCGGTGGCGCAGCGTTTTTTCACGGTTAGCGCCCGTCGCCA  
AATTCAGTTATCCGTTTTGGCTTCTGGTTCTAACATTTTCGGTCAAGCCGACCCGCATTCTGCGGTGGCTTACC  
TCGCCC

# Sequences of 7 seven housekeeping genes of *E. coli*

## **ST 405**

>adk35

GGGGAAAGGGACTCAGGCTCAGTTCATCATGGAGAAATATGGTATTCCGCAAATCTCCACTGGCGATATGCTGCG  
TGCTGCGGTCAAATCTGGCTCCGAGCTGGGTAAACAAGCAAAAGACATTATGGATGCTGGCAAACCTGGTCACTGA  
CGAACTGGTGATCGCGCTGGTTAAAGAGCGCATTGCTCAGGAAGACTGCCGTAATGGTTTTCTGTTGGACGGCTT  
CCCGCGTACCATTCCGCAGGCAGACGCGATGAAAGAAGCGGGCATCAATGTTGATTACGTTCTGGAATTCGACGT  
ACCGGACGAACTGATCGTTGACCGTATCGTCGGTCGCCGCGTTACGCGCCGTCTGGTCTGTTTTATCACGTTAA  
ATTCAATCCGCCGAAAGTAGAAGGCAAAGACGACGTTACCGGTGAAGAACTGACTACCCGTAAAGACGATCAGGA  
AGAAACCGTACGTAAACGTCTGGTTGAATACCATCAGATGACTGCACCGCTGATCGGCTACTACTCCAAAGAAGC  
GGAAGCGGGTA

>fumC37

CGAGCGCCATTTCGTAGGCGGCGGATGAAGTACTGGCAGGACAGCATGACGACGAATTCCCGCTGGCTATCTGGC  
AGACCGGCTCCGGCAGCGAAAGTAATATGAACATGAACGAAGTGCTGGCTAACCGGGCCAGTGAATTACTCGGCG  
GCGTGCGTGGGATGGAGCGTAAAGTTCACCCCTAACGACGACGTGAACAAAAGCCAAAGTTCTAACGATGTCTTTC  
CAACGGCGATGCACGTTGCGGCGCTGCTGGCGCTGCGCAAGCAACTCATTCCGCAGCTTAAAAACCTGACACAGA  
CACTGAATGAGAAATCGCGCGCATTTCGCGATATCGTCAAAATCGGTGCAACCCACTTGCAGGATGCCACGCCGC  
TAACACTGGGGCAGGAGATTTCCGGCTGGGTAGCGATGCTCGAGCATAATCTCAAACATATCGAATACAGCCTGC  
CGCATGTAGCGGAACTGGC

>gyrB29

GGTCTGACGCGGCTTGGTGTTCGGTAGTAAACGCCCTGTGCAAAAACTGGAGCTGGTTATCCAGCGCGAGGGT  
AAAATTCACCGTCAGATCTACGAACACGGTGTACCGAGGCTCCGCTGGCGGTTACCGGCGAGACTGAAAAAAC  
GGCACCATGGTGCGTTTTCTGGCCCAGCCTCGAAACCTTCACCAATGTGACCGAGTTGGAATATGAAATTCGGCG  
AAACGTCTGCGTGAGTTGTGCTTCCTCAACTCCGGCGTTTCCATTCTGCTGCGCGACAAGCGCGACGGTAAAGAA  
GACCACTTCCACTATGAAGGCGGCATCAAGGCGTTCTGTTGAATATCTGAACAAGAAACAAAACGCCGATCCACCCG  
AATATCTTCTACTTCTCCACCGAAAAAGATGGTATCGGCGTGAAGTGGCGTTGCAGTGGAACGATGGCTTCCAG  
GAAAACATCT

>icd25

CGACGCTGCAGTCGAGAAAGCCTATAAAGGCGAGCGTAAAATCTCCTGGATGGAAATTTACACCGGTGAAAAATC  
CACACAGGTTTATGGTCAGGATGTCTGGCTGCCTGCTGAAACCCCTTGATCTGATTCTGTAATATCGCGTTGCCAT  
TAAAGGCCCTCTGACCACTCCGTTGGTGGCGGTATTCTGTTCTCTGAACGTTGCCCTGCGCCAGGAACCTGGATCT  
CTACATCTGCCTGCGTCCGGTACGTTACTATCAGGGCACCCCAAGCCCGGTTAAACATCCTGAACCTGACCGATAT  
GGTTATCTTCCGTGAAAACTCGGAAGACATTTATGCGGGTATCGAATGGAAAGCTGACTCTGCCGACGCCGAGAA  
AGTGATTAAATTCCTGCGTGAAGAGATGGGCGTGAAGAAAATTCGCTTCCCGGAACATTGCGGTATCGGTATTAA  
GCCGTGTTGGAAGAAGGCACCAAACGTCTGGTTCTGTCAGCGATCGAATACGCAATTGCTAACGATC

>mdh4

GGTGTAGCGCTAAACCGGGTATGGATCGTTCCGACCTGTTTAAAGTTAAAGCCGGCATCGTGAAAAACCTGGTA  
CAGCAAGTTGCGAAACCTGCCCCGAAAGCGTGCATTGGTATTATCACTAACCCGGTTAACACCACAGATTGCGATT  
GCTGCTGAAGTGCTGAAAAAAGCCGGTGTATTGACAAAAACAACTGTTCCGGCGTTACCAACGCTGGATATCATT  
CGTTCCAACACCTTTGTTGCGAACTGAAAGGCAAACAGCCAGGCGAAGTTGAAGTGCCGGTTATTGGTGTAC  
TCTGGTGTACCATTCTGCCGCTGCTGTACAGGTTCTGGCGTTAGCTTTACCGAGCAGGAAGTGGCTGATCTG  
ACCAAACGTATCCAGAACGCGGGTACTGAGGTGGTTGAAGCGAAAGCCGGTGGCGGGTCTGCAACCCTGTCTATG  
GG

>purA5

ATAACGCGCGTGAGAAAGCGCGTGGCGCGAAAGCGATCGGCACCACCGGTCGTGGTATCGGGCCTGCTTATGAAG  
ATAAAGTGGCACGTCGCGTCTGCGTGTGGCGACCTTTTCGACAAAGAAACCTTCGCTGAAAAACTGAAAGAAG  
TGATGGAATATCACAACCTCCAGTTGGTTAACTACTACAAAGCTGAAGCGGTTGATTACCAGAAAGTTCTGGATG  
ATACGATGGCTGTTGCCGACATCCTGACTTCTATGGTGGTTGACGTTTCTGACCTGCTCGACCAGGCGCGTCAGC  
GTGGCGATTTCTGTCATGTTTGAAGGTGCTCAGGGTACGCTGCTGGATATCGACCACGGTACTTATCCGTACGTAA  
CATCTTCCAACACCACTGCTGGTGGCGTGGCGACCGGTTCCGGCCTGGGCCCCGCTTATGTTGATTACGTTCTCG  
GTATCCTCAAAGCTTACTCCACTCGTGT

>recA73

TGCACGTAAACTGGGCGTCGATATCGACAACCTGCTGTGCTCCCAGCCGGACACTGGCGAGCAGGCACTGGAAAT  
CTGTGACGCCCTGGCGCGTTCTGGTGCAGTAGACGTTATCGTCGTTGACTCCGTGGCGGCACTGACGCCGAAAGC  
GGAAATCGAAGGCGAAATCGGCGACTCTCACATGGGCCTTGGCGACGTATGATGAGCCAGGCGATGCGTAAGCT  
GGCGGGTAACCTGAAGCAGTCCAACACGCTGCTGATCTTCATCAACCAGATCCGTATGAAAAATTGGTGTGATGTT

CGGTAACCCGGAACCACTACCGGTGGTAACGCGCTGAAATTCTACGCCTCTGTTTCGTCTCGACATCCGTCGTAT  
CGGCGCGGTGAAAGAGGGCGAAAACGTGGTGGGTAGCGAAACCCGTGTGAAAGTGGTGAAGAACAAAATCGCTGC  
TCCGTTTTAAACAGGCTGAATTCCAGATCCT  
CTACGGCGAAGGTATCAACTTCTATGGCGA

### **ST58**

>adk6

GGGGAAAGGGACTCAGGCTCAGTTCATCATGGAGAAATATGGTATTCCGCAAATCTCCACTGGCGATATGCTGCG  
TGCTGCGGTCAAATCTGGCTCCGAGCTGGGTAAACAAGCAAAAGACATTATGGATGCTGGCAAACCTGGTCACCGA  
CGAACTGGTGATCGCGCTGGTTAAAGAGCGCATTGCTCAGGAAGACTGCCGTAATGGTTTCCTGTTGGACGGCTT  
CCCGCGTACCATTCCGCAGGCAGACGCGATGAAAGAAGCGGGCATCAATGTTGATTACGTTCTGGAATTCGACGT  
ACCGGACGAACTGATTGTTGATCGTATCGTAGGCCGCCGCTTCATGCGCCGTCTGGTCGTGTTTATCACGTTAA  
ATTCAATCCGCCGAAAGTAGAAGGCAAAGACGACGTTACCGGTGAAGAACTGACTACCCGTAAAAGACGATCAGGA  
AGAAACCGTGCGTAAACGTCTGGTTGAATACCATCAGATGACTGCACCGCTGATCGGCTACTACTCCAAAGAAGC  
GGAAGCGGGTA

>fumC4

CGAGCGCCATTTCGGCAGGCGGCGGATGAAGTACTGGCAGGACAGCATGACGACGAATTCCCGCTGGCTATCTGGC  
AGACCGGCTCCGGCACGCAAAGTAACATGAACATGAACGAAGTGCTGGCTAACCGGGCCAGTGAATTACTCGGCG  
GCGTGCGCGGGATGGAACGTAAAGTTCACCCCTAACGACGACGTGAACAAAAGCCAAAGTTCCAACGATGCTTTTC  
CGACGGCGATGCACGTTGCGGCGCTGCTGGCGCTGCGCAAGCAACTCATTCCGCAGCTTAAAAACCTGACACAGA  
CACTGAGTGAAAAATCGCGTGCAATTTGCCGATATCGTCAAAATCGGTGCAACCCACTTGCAGGACGCCACGCCGC  
TAACACTAGGGCAGGAGATTTCCGGCTGGGTAGCGATGCTCGAGCATAATCTCAACATATCGAATACAGCCTGC  
CTCACGTAGCGGAACTGGC

>gyrB4

GGTCTGCACGGCGTTGGTGTTCGCTAGTAAACGCCCTGTGCGAAAACTGGAGCTGGTTATCCAGCGCGAGGGT  
AAAATTACCGTCAGATCTACGAACACGGTGTACCGCAGGCCCCGTGGCGGTTACCGCGAGATGAAAAAAC  
GGACCATTGGTGCGTTTCTGGCCCAGCCTCGAAACCTTCACCAATGTGACCGAGTTCGAATATGAAATTCCTGGCG  
AAACGTCTGCGTGAGTTGTGCTTCCTCAACTCCGGCGTTTCCATTTCGTCTGCGCGACAAGCGCGACGGCAAAGAA  
GACCACTTCCACTATGAAGGCGGCATCAAGGCGTTTCGTTGAATATCTGAACAAGAACAAAAACGCCGATCCACCCG  
AATATCTTCTACTTCTCCACTGAAAAAGACGGTATTGGCGTCAAGTGGCGTTGCAGTGGAACGATGGCTTCCAG  
GAAAACATCT

>icd16

CGACGCTGCAGTCGAGAAAGCCTATAAAGGCGAGCGTAAAATCTCCTGGATGGAAATTTACACCGGTGAAAAATC  
CACACAGGTTTATGGTCAGGACGTCTGGCTGCCTGCTGAAACTCTTGATCTGATTTCGTGAATATCGCGTTGCCAT  
TAAAGGTCCGCTGACCACTCCTGTTGGTGGCGGTATTTCGCTCTCTGAACGTTGCCCTGCGCCAGGAACGGATCT  
CTACATCTGCCTGCGTCCGGTACGTTACTATCAAGGCACTCCAAGCCCGGTTAAACACCTTGAACGACCGATAT  
GGTTATCTTCCGTGAAAACTCGGAAGACATTTATGCGGGTATCGAATGGAAAGCAGACTCTGCCGACGCCGAGAA  
AGTGATTAAATTCCTGCGTGAAGAGATGGGGGTGAAGAAAATTCGCTTCCCGGAACATTGTGGTATCGGTATTAA  
GCCGTGTTTCGGAAGAAGGCACCAAACGTCTGGTTTCGTGCAGCGATCGAATACGCAATTGCTAACGATC

>mdh24

GGTGTAGCGCGTAAACCGGGTATGGATCGTTCCGACCTGTTTAAACGTTAACGCCGGCATCGTGAAAAACCTGGTA  
CAGCAAGTTGCGAAAACCTGCCCCGAAAGCGTGCAATTGGTATTATCACTAACCCGGTTAACACCACTGTTGCAATT  
GCTGCTGAAGTGCTGAAAAAGCCGGTGTATTGACAAAAACAACTGTTTCGGCGTTACCACGCTGGATATCATT  
CGTTCCAACACCTTTGTTGCGGAACGAAAGGCAACAGCCAGGCGAAGTTGAAGTGCCGGTTATTGGCGGTAC  
TCTGGTGTTACCATTCTGCCGCTGCTGTACAGGTTCTTGCGGTTAGTTTTACCGAGCAGGAAGTGGCTGATCTG  
ACCAAACGTATCCAGAACGCGGGTACTGAGGTGGTTGAAGCGAAAGCCGGTGGCGGGTCTGCAACCCTGTCTATG  
GG

>purA8

ATAACGCGCGTGAGAAAGCGCGTGGCGCGAAAGCGATCGGCACCACCGGTCTGTTATCGGGCCTGCTTATGAAG  
ATAAAGTAGCACGTGCGGTCTGCGTGTTGGCGACCTTTTCGACAAAGAAACCTTCGCTGAAAAACTGAAAGAAG  
TGATGGAATATCACAACCTCCAGTTGGTTAACTACTACAAAGCTGAAGCGGTTGATTACCAGAAAGTCTGGATG  
ATACGATGGCTGTTGCCGACATCCTGACTTCTATGGTGGTTGACGTTTCTGACCTGCTCGACCAGGCGCGTCAGC  
GTGGCGATTTTCGTATGTTTGAAGGTGCGCAGGGTACGCTGCTGGATATCGACCACGGTACTTATCCGTACGTAA  
CTTCTTCCAACACCACTGCTGGTGGCGTGGCGACCGGTTCCGGCCTGGGCCCCGCTTATGTTGATTACGTTCTGG  
GTATCCTCAAAGCTTACTCCACTCGTGT

>recA14

CGCACGTAAACTGGGCGTCGATATTGATAACCTGCTGTGCTCCCAGCCGGACACCGGCGAGCAGGCACTGGAAAT  
CTGTGACGCCCTGGCGCGTTCTGGCGCAGTAGACGTTATCGTCGTTGACTCCGTGGCGGCACTGACGCCGAAAGC  
GGAAATCGAAGGCGAAATCGGCGACTCTCACATGGGCCTTGCGGCACGTATGATGAGCCAGGCGATGCGTAAGCT  
GGCGGGTAACCTGAAGCAGTCCAACACGCTGCTGATCTTCATCAACCAGATCCGTATGAAAAATTGGTGTGATGTT

CGGTAACCCGGAACCACTACCGGTGGTAACGCGCTGAAATTCTACGCCTCTGTTTCGTCTCGACATCCGTCGTAT  
CGGCGCGGTGAAAGAGGGCGAAAACGTGGTGGGTAGCGAAACCCGCGTGAAAGTGGTGAAAGACAAAATCGCTGC  
ACCGTTTAAACAGGCTGAATTTAGATCCTCTACGGCGAAGGTATCAACTTCTACGGCGA

### **ST10**

>adk10

GGGGAAAGGGACTCAGGCTCAGTTCATCATGGAGAAATATGGTATTCCGCAAATCTCCACTGGCGATATGCTGCG  
TGCTGCGGTCAAATCTGGCTCCGAGCTGGGTAAACAAGCAAAAGACATTATGGATGCTGGCAAACCTGGTCACCGA  
CGAACTGGTGATCGCGCTGGTTAAAGAGCGCATTGCTCAGGAAGACTGCCGTAATGGTTTCTGTGACGGCTT  
CCCGCGTACCATTCCGCGAGGCAGACGCGATGAAAGAAGCGGGCATCAATGTTGATTACGTTCTGGAATTCGACGT  
ACCGGACGAACTGATCGTTGACCGTATCGTCGGTCGCGCGTTTCATGCGCCGTCTGGTCGTGTTTATCACGTTAA  
ATTCAATCCGCCGAAAGTAGAAGGCAAAGACGACGTTACCGGTGAAGAACTGACTACCCGTAAAAGATGATCAGGA  
AGAGACCGTACGTAAACGTCTGGTTGAATACCATCAGATGACAGCACCGCTGATCGGCTACTACTCCAAAAGAAGC  
AGAAGCGGGTA

>fumC11

CGAGCGCCATTTCGTGAGGCGGCGGATGAAGTACTGGCAGGACAGCATGACGACGAATTCCCGCTGGCTATCTGGC  
AGACCGGCTCCGGCAGCGAAAGTAACATGAACATGAACGAAGTGCTGGCTAACCGGGCCAGTGAATTACTCGGCG  
GTGTGCGCGGGATGGAACGTAAAGTTCACCTAACGACGACGTGAACAAAAGCCAAAGTTCACACGATGTCTTTC  
CGACGGCGATGCACGTTGCGGCGCTGCTGGCGCTGCGCAAGCAACTCATTCTCAGCTTAAAACCTGACACAGA  
CACTGAATGAGAAATCCCGTGCTTTTGCCGATATCGTCAAAATTGGTCGTACTCACTTGCAGGATGCCACGCCGT  
TAACGCTGGGGCAGGAGATTTCCGGCTGGGTAGCGATGCTCGAGCATAATCTCAACATATCGAATACAGCCTGC  
CTCACGTAGCGGAACCTGGC

>gyrB4

GGTCTGCACGGCGTTGGTGTTTCGGTAGTAAACGCCCTGTGCAAAAACTGGAGCTGGTTATCCAGCGCGAGGGT  
AAAATTACCGTCAGATCTACGAACACGGTGTAACCGCAGGCCCCGCTGGCGGTTACCGGCGAGACTGAAAAAACC  
GGCACCATCGGCTGCTTTTCGGCCAGCCTCGAAACCTTCACCAATGTGACCGAGTTCGAATATGAAATTCGCGCG  
AAACGTCTGCGTGAGTTGTCTGTTCTCAACTCCGGCGTTTCCATTCTGCTGCGCGACAAGCGCGACGGCAAAGAA  
GACCACTTCCACTATGAAGGCGGCATCAAGGCGTTGTTGAATATCTGAACAAGAACAACCGCCGATCCACCCG  
AATATCTTCTACTTCTCCACTGAAAAAGACGGTATTGGCGTCGAAGTGGCGTTGCAGTGGAACGATGGCTTCCAG  
GAAAAATCT

>icd8

CGACGCTGCAGTCGAGAAAGCCTATAAAGGCGAGCGTAAAATCTCCTGGATGGAAATTTACACCGGTGAAAAATC  
CACACAGGTTTATGGTCAGGACGTCTGGCTGCCTGCTGAAACTCTTGATCTGATTCTGTAATATCGCGTTGCCAT  
TAAAGGTCCGCTGACCACTCCGGTTGGTGGCGGTATTGCTCTCTGAACGTTGCCCTGCGCCAGGAACCTGGATCT  
CTACATCTGCCTGCGTCCGGTACGTTACTATCAGGGCACTCCAAGCCCGGTTAAACACCTGAACTGACCGATAT  
GGTTATCTTCCGTGAAAACCTCGGAAGACATTTATGCGGGTATCGAATGGAAAGCAGACTCTGCCGACGCCGAGAA  
AGTGATTAAATTCCTGCGTGAAGAGATGGGGGTGAAGAAAATTGCTTCCCGGAACATTGTGGTATCGGTATTAA  
GCCGTGTTGGAAGAAGGCACCAAACGTCTGGTTGCTGCGAGCATCGAATACGCAATTGCTAACGATC

>mdh8

GGCGTAGCGCGTAAACCGGGTATGGATCGTTCCGACCTGTTTAAAGTTAACGCCGGCATCGTGAAAAACCTGGTA  
CAGCAAGTTGCGAAAACCTGCCCCGAAAGCGTGCAATTGGTATTATCACTAACCCGGTTAACACCACAGTTGCAATT  
GCTGCTGAAGTGCTGAAAAAAGCCGGTGTTTATGACAAAAACAACTGTTGCGCGTTACCACGCTGGATATCATT  
CGTTCCAACACCTTTGTTGCGGAACCTGAAAGGCAAACAGCCAGGCGAAGTTGAAGTGCCGGTTATTGGCGGTAC  
TCTGGTGTTACCACTTCTGCCGCTGCTGTACAGGTTCTGCGGCTTAGTTTTACCGAGCAGGAAGTGGCTGATCTG  
ACCAACGCATCCAGAACGCGGGTACTGAAGTGTTGAAGCGAAGGCCGGTGGCGGGTCTGCAACCTGTCTATG  
GG

>purA8

ATAACGCGCGTGAGAAAGCGCGTGGCGCGAAAGCGATCGGCACCACCGGTCTGGTATCGGGCCTGCTTATGAAG  
ATAAAGTAGCACGTGCGGCTCTGCGTGTTGGCGACCTTTTCGACAAAGAAACCTTCGCTGAAAAACTGAAAGAAG  
TGATGGAATATCACAACTTCAGTTGGTTAACTACTACAAAGCTGAAGCGGTTGATTACCAGAAAGTCTGGATG  
ATACGATGGCTGTTGCCGACATCCTGACTTCTATGGTGGTTGACGTTTCTGACCTGCTCGACCAGGCGCGTCAGC  
GTGGCGATTTCTGTCATGTTTGAAGGTGCGCAGGGTACGCTGCTGGATATCGACCACGGTACTTATCCGTACGTAA  
CTTCTTCCAACACCACTGCTGGTGGCGTGGCGACCGGTTCCGGCCTGGGCCCCGCTTATGTTGATTACGTTCTGG  
GTATCCTCAAAGCTTACTCCACTCGTGT

>recA2

CGCACGTAAACTGGGCGTCGATATCGACAACCTGCTGTGCTCCCAGCCGGACACCGGCGAGCAGGCACTGGAAAT  
CTGTGACGCCCTGGCGCGTTCTGGCGCAGTAGACGTTATCGTCGTTGACTCCGTGGCGGCACTGACGCCGAAAGC  
GGAAATCGAAGGCGAAATCGGCGACTCTCACATGGGCCTTGCGGCACGTATGATGAGCCAGGCGATGCGTAAGCT  
GGCGGGTAACCTGAAGCAGTCCAACACGCTGCTGATCTTCATCAACCAGATCCGTATGAAAATTGGTGTGATGTT



CGGTAACCCGGAACCACTACCGGTGGTAACGCGCTGAAATTCTACGCCTCTGTTTCGTCTCGACATCCGTCGTAT  
CGGCGCGGTGAAAGAGGGCGAAAACGTGGTGGGTAGCGAAAACCCGCGTGAAAGTGGTGAAAGACAAAATCGCTGC  
GCCGTTTAAACAGGCTGAATTCCAGATCCTCTACGGCGAAGGTATCAACTTCTACGGCGA

### **ST155**

>adk6

GGGGAAAGGGACTCAGGCTCAGTTCATCATGGAGAAATATGGTATTCCGCAAATCTCCACTGGCGATATGCTGCG  
TGCTGCGGTCAAATCTGGCTCCGAGCTGGGTAAACAAGCAAAAGACATTATGGATGCTGGCAAACCTGGTCACCGA  
CGAACTGGTGATCGCGCTGGTTAAAGAGCGCATTGCTCAGGAAGACTGCCGTAATGGTTTCTGTGGACGGCTT  
CCCGGTACCATTCCGCAGGCAGACGCGATGAAAGAAGCGGGCATCAATGTTGATTACGTTCTGGAATTCGACGT  
ACCGGACGAACTGATTGTTGATCGTATCGTAGGCCGCCGCGTTTCATGCGCCGTCTGGTCGTGTTTATCACGTTAA  
ATTCAATCCGCCGAAAGTAGAAGGCAAAGACGACGTTACCGGTGAAAGAACTGACTACCCGTAAAAGACGATCAGGA  
AGAAACCGTGCGTAAACGTCTGGTTGAATACCATCAGATGACTGCACCGCTGATCGGCTACTACTCCAAAGAAGC  
GGAAGCGGGTA

>fumC4

CGAGCGCCATTTCGGCAGGCGGCGGATGAAGTACTGGCAGGACAGCATGACGACGAATTCCCGCTGGCTATCTGGC  
AGACCGGTCCGGCAGCAAAGTAACATGAACATGAACGAAGTGCTGGCTAACCGGGCCAGTGAATTACTCGGCG  
GCGTGCGCGGGATGGAACGTAAAGTTCACCTAACGACGACGTGAACAAAAGCCAAAGTTCACACGATGTCTTTC  
CGACGGCGATGCACGTTGCGGCGCTGCTGGCGCTGCGCAAGCAACTCATTCCGCAGCTTAAAACCTTGACACAGA  
CACTGAGTGAAAAATCGCGTGCAATTTGCCGATATCGTCAAAATCGGTGCAACCCACTTGCAGGACGCCACGCCGC  
TAACACTAGGGCAGGAGATTTCCGGCTGGGTAGCGATGCTCGAGCATAATCTCAACATATCGAATACAGCCTGC  
CTCACGTAGCGGAACCTGGC

>gyrB14

GGTCTGCACGGCGTTGGTGTTTTCGGTAGTAAACGCCCTGTGCAAAAACTGGAGCTGGTTATCCAGCGCGAGGGT  
AAAATTACCGTCAGATCTACGAACACGGTGTAACCGCAGGCCCCGCTGGCGGTTACCGGCGAGACTGAAAAAAC  
GGCACCATTGGTGCGTTTTCTGGCCTAGCCTCGAAACCTTCACCAATGTGACCGAGTTCGAATATGAAATTCTGGCG  
AAACGTCTGCGTGAGTTGTGCTTCTCAACTCCGGCGTTTCCATTGCTGCGCGACAAGCGTGACGGCAAAGAA  
GACCACTTCCACTATGAAGGCGGCATCAAGGCGTTTCGTTGAATATCTGAACAAGAACAACCGCCGATCCACCCG  
AATATCTTCTACTTCTCCACCGAAAAAGACGGTATTGGCGTCAAGTGGCGTTGCAGTGGAACGATGGCTTCCAG  
GAAAAATCT

>icd16

CGACGCTGCAGTCGAGAAAGCCTATAAAGGCGAGCGTAAAATCTCCTGGATGGAAATTTACACCGGTGAAAAATC  
CACACAGGTTTTATGGTCAGGACGTCTGGCTGCCTGCTGAAACTCTTGATCTGATTGCTGAATATCGCGTTGCCAT  
TAAAGGTCCGCTGACCACTCCTGTTGGTGGCGGTATTGCTCTCTGAACGTTGCCCTGCGCCAGGAACCTGGATCT  
CTACATCTGCCTGCGTCCGGTACGTTACTATCAAGGCACTCCAAGCCCGGTTAAACACCTGAACTGACCGATAT  
GGTTATCTTCCGTGAAAACCTCGGAAGACATTTATGCGGGTATCGAATGGAAAGCAGACTCTGCCGACGCCGAGAA  
AGTGATTAAATTCCTGCGTGAAGAGATGGGGGTGAAGAAAATTCGCTTCCCGGAACATTGTGGTATCGGTATTAA  
GCCGTGTTTCGGAAGAAGGCACCAAACGTCTGGTTTCGTGACGCGATCGAATACGCAATTGCTAACGATC

>mdh24

GGTGTAGCGCGTAAACCGGGTATGGATCGTTCCGACCTGTTTAAACGTTAACGCCGGCATCGTGAAAAACCTGGTA  
CAGCAAGTTGCGAAAACCTGCCCCGAAAGCGTGCAATTGGTATTATCACTAACCCGGTTAACACCACTGTTGCAATT  
GCTGCTGAAGTGCTGAAAAAAGCCGGTGTTTATGACAAAAACAACTGTTTCGGCGTTACCACGCTGGATATCATT  
CGTTCCAACACCTTTGTTGCGGAACCTGAAAGGCAAACAGCCAGGCGAAGTTGAAGTGCCGGTTATTGGCGGTAC  
TCTGGTGTTACCACTTCTGCCGCTGCTGTACAGGTTCTGGCGTTAGTTTTACCGAGCAGGAAGTGGCTGATCTG  
ACCAACGTATCCAGAACGCGGGTACTGAGGTGGTTGAAGCGAAAGCCGGTGGCGGGTCTGCAACCTGTCTATG  
GG

>purA8

ATAACGCGCGTGAGAAAGCGCGTGGCGCGAAAGCGATCGGCACCACCGGTCTGTTGATCGGGCCTGCTTATGAAG  
ATAAAGTAGCACGTGCGGTCTGCGTGTTGGCGACCTTTTCGACAAAGAAACCTTCGCTGAAAAACTGAAAGAAG  
TGATGGAATATCACAACTTCCAGTTGGTTAACTACTACAAAGCTGAAGCGGTTGATTACCAGAAAGTTCTGGATG  
ATACGATGGCTGTTGCCGACATCCTGACTTCTATGGTGGTTGACGTTTCTGACCTGCTCGACCAGGCGCGTCAGC  
GTGGCGATTTTCGTATGTTTGAAGGTGCGCAGGGTACGCTGCTGGATATCGACCACGGTACTTATCCGTACGTAA  
CTTCTTCCAACACCACTGCTGGTGGCGTGGCGACCGGTTCCGGCCTGGGCCCCGCGTTATGTTGATTACGTTCTGG  
GTATCCTCAAAGCTTACTCCACTCGTGT

>recA14

CGCACGTAAACTGGGCGTCGATATTGATAACCTGCTGTGCTCCCAGCCGGACACCGGCGAGCAGGCACTGGAAAT  
CTGTGACGCCCTGGCGCGTTCTGGCGCAGTAGACGTTATCGTCGTTGACTCCGTGGCGGCACTGACGCCGAAAGC  
GGAAATCGAAGGCGAAATCGGCGACTCTCACATGGGCCTTGCGGCACGTATGATGAGCCAGGCGATGCGTAAGCT  
GGCGGGTAACCTGAAGCAGTCCAACACGCTGCTGATCTTCATCAACCAGATCCGTATGAAAATTTGGTGTGATGTT

CGGTAACCCGGAACCACTACCGGTGGTAACGCGCTGAAATTCTACGCCTCTGTTTCGTCTCGACATCCGTCGTAT  
CGGCGCGGTGAAAGAGGGCGAAAACGTGGTGGGTAGCGAAACCCGCGTGAAAGTGGTGAAAGACAAAATCGCTGC  
ACCGTTTAAACAGGCTGAATTTAGATCCTCTACGGCGAAGGTATCAACTTCTACGGCGA

### **ST399**

>adk6

GGGGAAAGGGACTCAGGCTCAGTTCATCATGGAGAAATATGGTATTCCGCAAATCTCCACTGGCGATATGCTGCG  
TGCTGCGGTCAAATCTGGCTCCGAGCTGGGTAAACAAGCAAAAGACATTATGGATGCTGGCAAACCTGGTCACCGA  
CGAACTGGTGATCGCGCTGGTTAAAGAGCGCATTGCTCAGGAAGACTGCCGTAATGGTTTCTGTGGACGGCTT  
CCCGCGTACCATTCCGCGAGGCAGACGCGATGAAAGAAGCGGGCATCAATGTTGATTACGTTCTGGAATTCGACGT  
ACCGGACGAACTGATTGTTGATCGTATCGTAGGCCGCCGCGTTTCATGCGCCGTCTGGTCGTGTTTATCACGTTAA  
ATTCAATCCGCCGAAAGTAGAAGGCAAAGACGACGTTACCGGTGAAAGAACTGACTACCCGTAAAAGACGATCAGGA  
AGAAACCGTGCGTAAACGTCTGGTTGAATACCATCAGATGACTGCACCGCTGATCGGCTACTACTCCAAAAGAAGC  
GGAAGCGGGTA

>fumC4

CGAGCGCCATTTCGGCAGGCGGCGGATGAAGTACTGGCAGGACAGCATGACGACGAATTCCCGCTGGCTATCTGGC  
AGACCGGTCCGGCAGCGAAAGTAACATGAACATGAACGAAGTGCTGGCTAACCGGGCCAGTGAATTACTCGGCG  
GCGTGCGCGGGATGGAACGTAAAGTTCACCTAACGACGACGTGAACAAAAGCCAAAGTTCACACGATGTCTTTC  
CGACGGCGATGCACGTTGCGGCGCTGCTGGCGCTGCGCAAGCAACTCATTCCGCAGCTTAAAACCTGACACAGA  
CACTGAGTGAAAAATCGCGTGCAATTTGCCGATATCGTCAAAAATCGGTGCAACCCACTTGCAGGACGCCACGCCGC  
TAACACTAGGGCAGGAGATTTCCGGCTGGGTAGCGATGCTCGAGCATAATCTCAACATATCGAATACAGCCTGC  
CTCACGTAGCGGAACCTGGC

>gyrB1

GGTCTGCACGGCGTTGGTGTTTTCGGTAGTAAACGCCCTGTGCAAAAACTGGAGCTGGTTATCCAGCGCGAGGGT  
AAAATTACCGTCAGATCTACGAACACGGTGTAACCGCAGGCTCCGCTGGCGGTTACCGGCGAGACTGAAAAAAC  
GGCACCATTGGTGCGTTTTTCGGCCAGCCTCGAAACCTTCACCAATGTGACCGAGTTCGAATATGAAATTCTGGCG  
AAACGTCTGCGTGAGTTGTCTGTTCTCAACTCCGGCGTTTCCATTGCTCTGCGCGACAAGCGTGACGGCAAAGAA  
GACCACTTCCACTATGAAGGCGGCATCAAGGCGTTGTTGAATATCTGAACAAGAACAACCGCCGATCCATCCG  
AATATCTTCTACTTCTCCACCGAAAAAGACGGTATTGGCGTCAAGTGGCGTTGCAGTGGAACGATGGCTTCCAG  
GAAAACATCT

>icd95

CGACGCTGCAGTCGAGAAAGCCTATAAAGGCGAGCGTAAAATCTCCTGGATGGAAATTTACACCGGTGAAAAATC  
CACACAGGTTTTATGGTCAGGATGTCTGGCTGCCTGCTGAAACCCCTTGATCTGATTGCTGAATATCGCGTTGCCAT  
TAAAGGTCCGCTGACCACTCCTGTTGGTGGCGGTATTGCTCTCTGAACGTTGCCCTGCGCCAGGAACCTGGATCT  
CTACATCTGCCTGCGTCCGGTACGTTACTATCAGGGCACTCCAAGCCCGGTTAAACACCTGAACTGACCGATAT  
GGTTATTTTCCGTGAAAACCTCGGAAGACATTTATGCGGGTATCGAATGGAAAGCAGACTCTGCCGACGCCGAGAA  
AGTAATTAATTCCTGCGTGAAGAGATGGGGGTGAAGAAAATTCGCTTCCCGGAACATTGTGGTATCGGTATTAA  
GCCGTGTTTCGGAAGAAGGCACCAAACGTCTGGTTGCTGCAGCGATCGAATACGCAATTGCTAACGATC

>mdh69

GGTGTAGCGCGTAAACCGGGTATGGATCGTTCCGACCTGTTTAAAGTTAACGCCGGCATCGTGAAAAACCTGGTA  
CAGCAAGTTGCGAAAACCTGCCCCGAAAGCGTGATTGGTATTATCACTAACCCGGTTAACACCACAGTTGCGATT  
GCTGCTGAAGTGCTGAAAAAAGCCGGTGTTTATGACAAAAACAACTGTTCCGGCGTTACCACGCTGGATATCATT  
CGTTCCAACACTTTTGTGCGGAACCTGAAAGGCAAACAGCCAGGCGAAGTTGAAGTGCCGGTTATTGGCGGTAC  
TCTGGTGTTACCACTTCTGCCGCTGCTGTACAGGTTCTGGCGTTAGTTTTACCGAGCAGGAAGTGGCTGATCTG  
ACCAAACGTATCCAGAACGCGGGTACTGAGGTGGTTGAAGCGAAAGCCGGTGGCGGGTCTGCAACCTGTCTATG  
GG

>purA8

ATAACGCGCGTGAGAAAGCGCGTGGCGCGAAAGCGATCGGCACCACCGGTCTGGTATCGGGCCTGCTTATGAAG  
ATAAAGTAGCACGTGCGGCTCTGCGTGTTGGCGACCTTTTCGACAAAGAAACCTTCGCTGAAAAACTGAAAGAAG  
TGATGGAATATCACAACTTCAGTTGGTTAACTACTACAAAGCTGAAGCGGTTGATTACCAGAAAGTCTGGATG  
ATACGATGGCTGTTGCCGACATCCTGACTTCTATGGTGGTTGACGTTTCTGACCTGCTCGACCAGGCGCGTCAGC  
GTGGCGATTTCTGTCATGTTTGAAGGTGCGCAGGGTACGCTGCTGGATATCGACCACGGTACTTATCCGTACGTAA  
CTTCTTCCAACACCACTGCTGGTGGCGTGGCGACCGGTTCCGGCCTGGGCCCCGCGTTATGTTGATTACGTTCTGG  
GTATCCTCAAAGCTTACTCCACTCGTGT

>recA20

CGCACGTAAACTGGGCGTCGATATCGATAACCTGCTGTGCTCCCAGCCGGACACCGGCGAGCAGGCACTGGAAAT  
CTGTGACGCCCTGGCGCGTTCTGGCGCAGTAGACGTTATCGTCGTTGACTCCGTGGCGGCACTGACGCCGAAAGC  
GGAAATCGAAGGCGAAATCGGCGACTCTCACATGGGCCTTGCGGCACGTATGATGAGCCAGGCGATGCGTAAGCT  
GGCGGGTAACCTGAAGCAGTCCAACACGCTGCTGATCTTCATCAACCAGATCCGTATGAAAATTTGGTGTAATGTT

CGGTAACCCGGAACCACTACCGGTGGTAACGCGCTGAAATTCTACGCCTCTGTTTCGTCTCGACATCCGTCGTAT  
CGGCGCGGTGAAAGAGGGCGAAAACGTGGTGGGTAGCGAAAACCCGCGTGAAAGTGGTGAAAGACAAAATCGCTGC  
GCCGTTTAAACAGGCTGAATTCCAGATCCTCTACGGCGAAGGTATCAACTTCTACGGCGA

#### **ST617**

>adk10

GGGGAAAGGGACTCAGGCTCAGTTCATCATGGAGAAATATGGTATTCCGCAAATCTCCACTGGCGATATGCTGCG  
TGCTGCGGTCAAATCTGGCTCCGAGCTGGGTAAACAAGCAAAAGACATTATGGATGCTGGCAAACCTGGTCACCGA  
CGAACTGGTGATCGCGCTGGTTAAAGAGCGCATTGCTCAGGAAGACTGCCGTAATGGTTTCTGTGACGGCTT  
CCCGCGTACCATTCCGAGGCGAGACGCGATGAAAGAAGCGGGCATCAATGTTGATTACGTTCTGGAATTCGACGT  
ACCGGACGAACTGATCGTTGACCGTATCGTCGGTCGCCGCGTTCATGCGCCGCTCTGGTCGTGTTATCACGTTAA  
ATTCAATCCGCCGAAAGTAGAAGGCAAAGACGACGTTACCGGTGAAGAACTGACTACCCGTAAAAGATGATCAGGA  
AGAGACCGTACGTAAACGTCTGGTTGAATACCATCAGATGACAGCACCGCTGATCGGCTACTACTCCAAAAGAAGC  
AGAAGCGGGTA

>fumC11

CGAGCGCCATTTCGTGAGGCGGCGGATGAAGTACTGGCAGGACAGCATGACGACGAATTCCCGCTGGCTATCTGGC  
AGACCGGCTCCGGCACGCAAAGTAACATGAACATGAACGAAGTGCTGGCTAACCGGGCCAGTGAATTACTCGGCG  
GTGTGCGCGGGATGGAACGTAAAGTTCACCCTAACGACGACGTGAACAAAAGCCAAAGTTCCAACGATGTCTTTC  
CGACGGCGATGCACGTTGCGGCGCTGCTGGCGCTGCGCAAGCAACTCATTCTCAGCTTAAAACCTGACACAGA  
CACTGAATGAGAAATCCCGTGCTTTTGCCGATATCGTCAAAATTGGTCGTACTCACTTGCAGGATGCCACGCCGT  
TAACGCTGGGGCAGGAGATTTCCGGCTGGGTAGCGATGCTCGAGCATAATCTCAACATATCGAATACAGCCTGC  
CTCACGTAGCGGAACCTGGC

>gyrB4

GGTCTGCACGGCGTTGGTGTTTTCGGTAGTAAACGCCCTGTGCGAAAAACTGGAGCTGGTTATCCAGCGCGAGGGT  
AAAATTCACCGTCAGATCTACGAACACGGTGTACCGCAGGCCCCGCTGGCGGTTACCGGCGAGACTGAAAAAAC  
GGCACCATGGTGCGTTTTCTGGCCCAGCCTCGAAACCTTCACCAATGTGACCGAGTTCGAATATGAAATTCTGGCG  
AAACGCTCTGCGTAGTTGTGCTTCTCAACTCCGGCGTTTTCCATTGCTCTGCGCGACAAGCGCGACGGCAAAGAA  
GACCACTTCCACTATGAAGGCGGCATCAAGGCGTTTCGTTGAATATCTGAACAAGAACAAAACGCCGATCCACCCG  
AATATCTTCTACTTCTCACTGAAAAAGACGGTATTGGCGTCGAAGTGCGGTTGCAGTGGAACGATGGCTTCCAG  
GAAAACATCT

>icd8

CGACGCTGCAGTCGAGAAAGCCTATAAAGGCGAGCGTAAAATCTCCTGGATGGAAATTTACACCGGTGAAAAATC  
CACACAGGTTTTATGGTCAGGACGTCTGGCTGCCTGCTGAAACTCTTGATCTGATTCTGTAATATCGCGTTGCCAT  
TAAAGGTCCGCTGACCACTCCGGTTGGTGGCGGTATTTCGCTCTCTGAACGTTGCCCTGCGCCAGGAACTGGATCT  
CTACATCTGCCTGCGTCCGGTACGTTACTATCAGGGCACTCCAAGCCCGGTTAAACACCCTGAACTGACCGATAT  
GGTTATCTTCCGTGAAAACTCGGAAGACATTTATGCGGGTATCGAATGGAAAGCAGACTCTGCCGACGCCGAGAA  
AGTGATTAAATTCCTGCGTGAAGAGATGGGGGTGAAGAAAATTGCTTCCCGGAACATTGTGGTATCGGTATTAA  
GCCGTGTTTCGGAAGAAGGCACCAAACGTCTGGTTTCGTGACGCGATCGAATACGCAATTGCTAACGATC

>mdh8

GGCGTAGCGCGTAAACCGGGTATGGATCGTTCCGACCTGTTTAAAGTTAACGCCGGCATCGTGAAAAACCTGGTA  
CAGCAAGTTGCGAAAACCTGCCCCGAAAGCGTGCAATTGGTATTATCACTAACCCGGTTAACACCACAGTTGCAATT  
GCTGCTGAAGTGCTGAAAAAAGCCGGTGTATTGACAAAAACAACTGTTTCGGCGTTACCACGCTGGATATCATT  
CGTTCCAACACCTTTGTTGCGGAACTGAAAGGCAAACAGCCAGGCGAAGTTGAAGTGCCGGTTATTGGCGGTCAC  
TCTGGTGTTACCATTTCTGCCGCTGCTGTCACAGGTTCTGGCGTTAGTTTTACCGAGCAG  
GAAGTGGCTGATCTGACCAAACGCATCCAGAACGCGGGTACTGAAGTGTTGAAGCGAAGGCCGGTGGCGGGTCT  
GCAACCCTGTCTATGGG

>purA13

ATAACGCGCGTGAGAAAGCGCGTGGCGCGAAAGCGATCGGCACAACCGGTCTGGTATCGGGCCTGCTTATGAAG  
ATAAAGTAGCACGTGCGGCTCTGCGTGTTGGCGACCTTTTCGACAAAGAAACCTTCGCTGAAAACTGAAAGAAG  
TGATGGAATATCACAACTTCAGTTGGTTAACTACTACAAAGCTGAAGCGGTTGATTACCAGAAAGTTCTGGATG  
ATACGATGGCAGTTGCCGACATCCTGACTTCTATGGTGGTTGACGTTTCTGACCTGCTCGACCAGGCGCGTCAGC  
GTGGCGATTTTCGTATGTTTGAAGGTGCGCAGGGTACGCTGCTGGATATCGACCACGGTACTTATCCGTACGTAA  
CTTCTTCCAACACCACTGCTGGTGGCGTGGCGACCGGTTCCGGCCTGGGCCCCGCGTTATGTTGATTATGTTCTGG  
GTATCCTCAAAGCTTACTCAACTCGTGT

>recA73

TGCACGTAAACTGGGCGTCGATATCGACAACCTGCTGTGCTCCCAGCCGGACACTGGCGAGCAGGCACTGGAAAT  
CTGTGACGCCCTGGCGCGTTCTGGTGCAGTAGACGTTATCGTCGTTGACTCCGTGGCGGCACTGACGCCGAAAGC  
GGAAATCGAAGGCGAAATCGGCGACTCTCACATGGGCCTTGCGGCACGTATGATGAGCCAGGCGATGCGTAAGCT  
GGCGGGTAACCTGAAGCAGTCCAACACGCTGCTGATCTTCATCAACCAGATCCGTATGAAAATTGGTGTGATGTT

CGGTAACCCGGAACCACTACCGGTGGTAACGCGCTGAAATTCTACGCCTCTGTTTCGTCTCGACATCCGTCGTAT  
CGGCGCGGTGAAAGAGGGCGAAAACGTGGTGGGTAGCGAAACCCGTGTGAAAGTGGTGAAGAACAAAATCGCTGC  
TCCGTTTAAACAGGCTGAATTCCAGATCCTCTACGGCGAAGGTATCAACTTCTATGGCGA

#### Sequences of 7 seven housekeeping genes of *K. pneumoniae*

##### ST471

>gapA3

AACCTGAAGTGGGACGAAGTTGGTGTGACGTTGTTGCTGAAGCAACCGGTATCTTCTGACCGACGAAACCGCT  
CGTAAACACATCACCGCTGGCGCGAAAAAGTCGTTCTGACTGGCCCGTCCAAAGACAACACTCCGATGTTTCGTT  
CGCGGCGCTAACTTCGACGCTTACGCTGGCCAGGACATCGTTTCCAACGCTTCTGCAACCACTAATGCCCTGGCG  
CCGCTGGCTAAAGTTATCAACGACAACCTTCGGTATCGTTGAAGGCCTGATGACCACCGTCCACGCTACCACCGCT  
ACTCAGAAAACCGTTGATGGCCCGTCTCACAAGACTGGCGCGGCGGCCGCGGCGCAGCTCAGAACATCATCCCCG  
TCCTCTACCGGCGCTGCTAAAGCAGTAGGTAAAGTACTGCCAGAACTGAACGGCAAACTGACCGGTATGGCGTTC

>infB1

GGCATGATCACCTTCTGGATACCCCGGGCCACGCCGCGTTTACCTCCATGCGTGCTCGTGGCGCGCAGGCGACG  
GATATCGTGGTTCTGGTGGTGGCGGCAGACGACGGCGTGATGCCGAGACTATCGAAGCTATCCAGCACGCTAAA  
GCGGCGCAGGTACCGGTGGTAGTGGCGGTGAACAAGATCGATAAGCCAGAAGCCGATCCGGATCGCGTGAAGAAC  
GAACTGTCCCAGTACGGCATCCTGCCGGAAGAGTGGGGCGGCAGAGCCAGTTCGTCCACGTTTCCGCGAAAGCG  
GGTACCGGCATCGACGAC

>mdh1

GGCGCGGATGTAGTGCTGATCTCCGCGGGCGTGGCGCGTAAGCCCGGCATGGATCGTTCCGACCTGTTTAATGTG  
AATGCGGGTATCGTGAAGAACCTCGTGCAGCAGATTGCCAAAACCTGCCCGCAGGCCTGCATCGGCATTATCACC  
AACCCGGTGAATACCACCGTGGCTATCGCCGCCGAAGTACTGAAAAAGCCGGCGTGTACGATAAAAACAAACCTG  
TTCGGCGTTACCACGCTGGACATCATCCGTTCCAATACCTTTGTGGCGGAGCTGAAAGGTAAATCGGCAACCGAG  
GTGGAAGTCCCGGTCAATTGGTGGTCACTCCGGGGTCAACATTCTGCCTTTACTGTGCGAGATCCCCGGCGTCAGC  
TTTAGCGATCAGGAAATTGCCGACCTGACTAAACGTATTGAGAACGCCGGTACCGAAGTTCGTGGAAGCGAAAGCG  
GGCGGCGGGTCGGCGACCTTGTCTGATG

>pgi68

GAGTCCAACGGTAAGTATGTTGACCGTAACGGCCACGCGGTAGACTACCAGACTGGCCCAATCATCTGGGGTGAG  
CCGGGCACCAACGGTCAGCACGCGTTCTACCAGCTGATCCATCAGGGCACCAAAATGGTACCGTGCGATTTCATC  
GCTCCGGCTATACCCACAACCCGCTGTCTGACCACCATCAGAACTGCTGTCTAACTTCTTCGCCAGACCGAG  
GCCCTGGCCTTTGGTAAATCCCGCGAAGTGGTTGAGCAGGAATATCGCGATCAGGGTAAAGACCCGGCGACCCCTG  
GAGCACGTGGTGCCGTTCAAAGTGTTGGAAGTAACCGCCGACTAACTCCATCCTGCTGCGTGAGATCACCCCG  
TTCAGCCTCGGGGCGCTGATTGCCCTGTACGAGCACAAAATCTTCATCCAGGGCGCG

>phoE4

GTCGGCACCTCGTTAAGCTATGATTTTCGGCGGCAGCGACTTCGCCGTGAGCGCAGCCTACACCAGCTCCGACCGT  
ACCAACGATCAGAACCTGCTGGCCCGCGGCCAGGGTTTCGAAAGCGGAAGCCTGGGGCGACCGGCCTGAAATATGAC  
GCCAACAATATCTACCTGGCGACCATGTACTCTGAAACCCGCAAGATGACCCCGATCAGCGGCGGCTTTGCCAAC  
AAAGCGCAGAACTTTGAAGCGGTGGCGCAGTATCAGTTTCGACTTCGGTCTGCGTCCGTCCCTCGGCTATGTGCTG  
TCGAAAGGGAAGGATATCGAAGGGGTGGGAAGTGAGGATCTGGTTAACTACATTGACGTGGGCCTGACCTACTAC  
TTCAACAAAAACATGAACGCCTTCGTGGATTACAAAATCAACCAG

> rpoB1

ACCCACTACGGTCGCGTATGTCCGATCGAAACGCCTGAAGGTCCGAACATCGGTCTGATTAACTCCCTGTCCGTG  
TACGCGCAGACCAACGAATATGGCTTCCTTGAGACGCCGTATCGTAAAGTGACCAACGGTGTGGTTACTGACGAA  
ATTCACTACCTGTCTGCTATCGAAGAAGGCAACTACGTTATCGCTCAGGCGAACTCCAACCTGGATGAAAAACGGC  
CACTTCGTAGAAGATCTGGTTACCTGCCGTAGCAAAGGCGAATCCAGCTTGTTTCAGCCGCGACAGGTTGACTAC  
ATGGACGTATCCACCCAGCAGGTGGTATCCGTCCGTGCGTCCCTGATCCCGTTCCTGGAACACGATGACGCCAAC  
CGTGCAATTGATGGGTGCGAACATGCAACGTGAGGCGGTTCCGACTCTGCGCGCTGATAAGCCGCTGGTTGGTACC  
GGTATGGAACGTGCTGTTGCCGTTGACTCCGGTGTTACTGCCGTGGCTAAA

>tonB39

ATGGTGGCGCCGGCCGATCTTGAGCCGCCTCCGGCGGCGCAGCCTGTGCTGGAGCCCGTTGTTGAACCCGAACCT  
GAGCCGGAGCCAGAGGTAGCGCCTGAACCGCCGAAAGAGGCGCCGGTGGTGTATCCATAAACCCGAACCTAAGCCG  
AAGCCCAAACCTAAACCCAAGCCTAAGCCGGAGAAAAAGGTTGAACAGCCGAAGCGGGAAGTGAAGCCGGCAGCT  
GAGCCGCGTCCGGCCTCGCCGTTTGAAAAACAACAATACGGCGCCGGCGCGTACAGCGCCAAGCACCTCGACCCGA  
GCGGCTAAACCCACCGTTACTGCTCCGAGCGGCCCCGCGGGCGATCAGCCGCGTTCAGCCGTCTATCCGGCGCGC  
GCTCAGGCGCTGCGCATTGAAGGGACGGTACGGGTGAAG

##### ST101

>gapA2

AACCTGAAGTGGGACGAAGTTGGTGTGACGTTGTTGCTGAAGCAACCGGTATCTTCCTGACCGACGAAACCGCT  
CGTAAACACATCACCGCTGGCGCGAAAAAGTCGTTCTGACTGGCCCGTCCAAAGACAACACTCCGATGTTCCGTT  
CGCGGCGCTAACTTCGACGCTTACGCTGGCCAGGACATCGTTTCCAACGCTTCCTGCACCACCAACTGCCTGGCG  
CCGCTGGCTAAAGTTATCAACGACAACCTTCGGTATCGTTGAAGGCCTGATGACCACCGTCCACGCTACCACCGCT  
ACTCAGAAAACCGTTGATGGCCCGTCTCACAAGACTGGCGCGGCGGCCGCGGCGCAGCTCAGAACATCATCCCCG  
TCCTCTACCGGCGCTGCTAAAGCAGTAGGTAAAGTACTGCCAGAACTGAACGGCAAACCTGACCGGTATGGCGTTC  
>infB6  
GGCATGATCACCTTCCTGGATACCCCCGGGCCACGCCGCGTTTACCTCCATGCGTGCTCGTGGCGCGCAGGCGACG  
GATATCGTGGTTCTGGTGGTGGCGGCAGACGACGGCGTGATGCCGCAGACTATCGAAGCTATCCAGCACGCTAAA  
GCGGCGCAGGTACCGGTGGTAGTGGCGGTGAACAAGATCGATAAGCCAGAAGCCGATCCGGATCGCGTGAAGAAC  
GAACTGTCCCAGTACGGCATCCTGCCGAAGAGTGGGGCGGCGAGAGCCAGTTCGTCCACGTTTCCGCGAAAGCC  
GGTACCGGCATCGACGAC  
>mdh1  
GGCGCGGATGTAGTGCTGATCTCCGCGGGCGTGGCGCGTAAGCCCGGCATGGATCGTTCCGACCTGTTTAATGTG  
AATGCGGGTATCGTGAAGAACCTCGTGCAGCAGATTGCCAAAACCTGCCCGCAGGCCTGCATCGGCATTATCACC  
AACCCGGTGAATACCACCGTGGCTATCGCCGCCGAAGTACTGAAAAAGCCGGCGTGTACGATAAAAACAAACCTG  
TTCGGCGTTACCACGCTGGACATCATCCGTTCCAATACCTTTGTGGCGGAGCTGAAAGGTAAATCGGCAACCGAG  
GTGGAAGTCCCGGTCATTGGTGGTCACTCCGGGGTCACCATTCTGCCTTTACTGTGCGAGATCCCCGGCGTCAGC  
TTTAGCGATCAGGAAATTGCCGACCTGACTAAACGTATTGAGAACGCCCGGTACCGAAGTCGTGGAAGCGAAAGCG  
GGCGGCGGGTTCGGCGACCTTGTCGATG  
>pgi5  
GAGTCCAACGGTAAGTATGTTGACCGTAACGGCCACGCGGTAGACTACCAGACTGGCCCAATCATCTGGGGGGAG  
CCGGGCACCAACGGTCAGCACGCGTTCTACCAGCTGATCCACCAGGGCACCAAAATGGTACCGTGCGATTTTCATC  
GCTCCGGCTATCACCCACAACCCGCTGTCTGACCACCATCAGAAACTGCTGTCTAACTTCTTCGCCCAGACCGAG  
GCCCTGGCCTTTGGTAAATCCCGCGAAGTGGTTGAGCAGGAATATCGCGATCAGGGTAAAGACCCGGCGACCCCTG  
AGCACGTGGTGCCGTTCAAAGTGTTGGAAGGTAACCGCCCCGACTAACTCCATCCTGCTGCGTGAGATACCCCCGT  
TCAGCCTCGGGGCGCTGATTGCCCTGTACGAGCACAAAATCTTCACCCAGGGCGCG  
>phoE4  
GTCGGCACCTCGTTAAGCTATGATTTTCGGCGGCAGCGACTTCGCCGTGTCAGCGCAGCCTACACCAGCTCCGACCGT  
ACCAACGATCAGAACCTGCTGGCCCGCGGCCAGGGTTGAAAAGCGGAAGCCTGGGCGACCGGCCTGAAATATGAC  
GCCAACAATATCTACCTGGCGACCATGTACTCTGAAACCCGCAAGATGACCCCGATCAGCGGCGGCTTTGCCAAC  
AAAGCGCAGAACTTTGAAGCGGTGGCGCAGTATCAGTTCGACTTCGGTCTGCGTCCGTCCCTCGGCTATGTGCTG  
TCGAAAGGGAAGGATATCGAAGGGGTGGGAAGTGAGGATCTGGTTAACTACATTGACGTGGGCCTGACCTACTAC  
TTCAACAAAAACATGAACGCCTTCGTGGATTACAAAATCAACCAG  
>rpoB1  
ATGGACGTATCCACCCAGCAGGTGGTATCCGTCGGTGCGTCCCTGATCCCGTTTCCTGGAACACGATGACGCCAAC  
CGTGCAATTGATGGGTGCGAACATGCAACGTGAGGCGGTTCCGACTCTGCGCGCTGATAAGCCGCTGGTTGGTACC  
GGTATGGAACGTGCTGTTGCCGTTGACTCCGGTGTTACTGCCGTGGCTAAA  
>tonB6  
ATGGTGGCGCCGGCCGATCTTGAGCCGCCTCCGGCGGCGCAGCCTGTGCTGGAGCCCGTTGTTGAACCCGAACCT  
GAGCCGGAGCCAGAGGTAGTGCCTGAACCGCCGAAAGAGGCGCCGGTGGTGATCCATAAACCGGAACCTAAGCCG  
AAGCCCAAACCTAAACCCAAGCCTAAGCCGGAGAAAAAGGTTGAACAGCCGAAGCGGGAAGTGAAGCCGGCAGCA  
GAGCCGCGTCCGGCCTCGCCGTTTGAAAACAACAATACGGCGCCGGCGCGTACAGCGCCAAGTACCTCGACCGCA  
GCGGCTAAACCCACCGTTACTGCTCCGAGCGGCCCGGGCGGATCAGCCGCGTTCAGCCGTCTATCCAGCGCGC  
GCTCAGGCGCTGCGCATAGAAGGGACGGTACGGGTGAAG
