# Supplementary material for: Lineages, Virulence Gene Associated and Integrons among Extended Spectrum β-Lactamase (ESBL) and CMY-2 Producing Enterobacteriaceae from Bovine Mastitis, in Tunisia
Source: MDPI journal article supplement (doi:10.3390/pathogens11080948), 2022-08-22
Supplement: s1 [file s1]

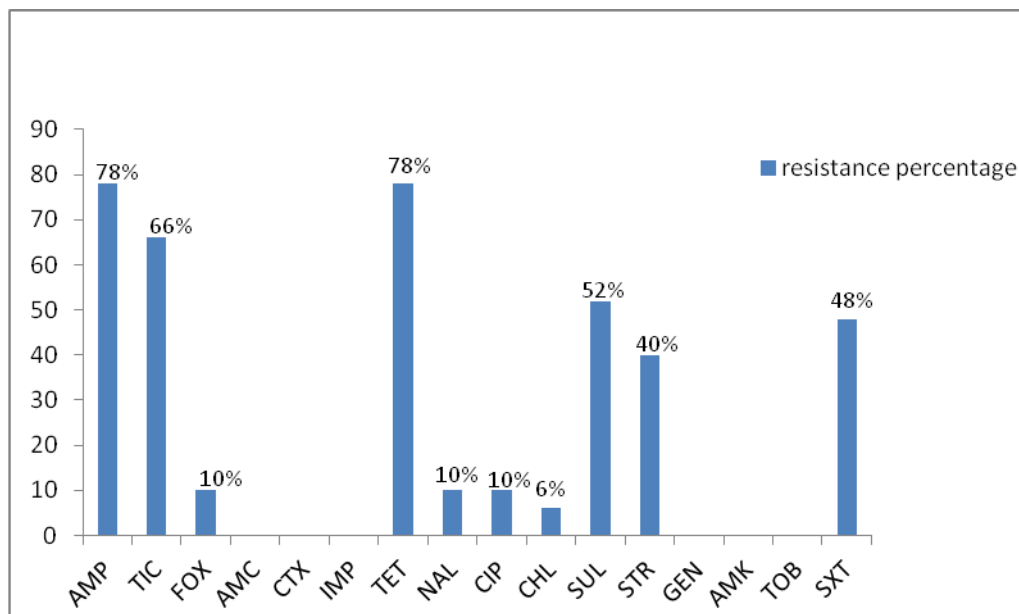

**Figure S1.** Antimicrobial resistance rate of 50 *E. coli* cefotaxime susceptible analyzed in this study. AMP: ampicillin; AMC: amoxicillin clavulanic acid; TIC: Ticarcillin, FOX: cefoxitin; CTX: céfotaxime ; CAZ: céftazidime; TET: tétracycline; NAL: nalidixic acid; CIP: ciprofloxacin; Sul: sulfonamide; SXT: trimethoprim-sulfamethoxazole; STR: streptomycin; CHL: Chloramphenicol, ;GEN: gentamicin; IMP: Imipenem; TOB: Tobramycin; % pourcentage.
